# Supplementary material for: Analysis of the anatomic relationship of the infraorbital canal with the roots of the maxillary fourth premolar tooth in the three different skull types: Mesocephalic, brachycephalic, and dolichocephalic, using cone beam computed tomography
Source: Front Vet Sci. 2022 Oct 4;9:978400. doi: 10.3389/fvets.2022.978400 (PMC9577602; doi:10.3389/fvets.2022.978400)
Supplement: Supplementary file 1 [file Table_1.XLSX]

## Sheet: Mesocephlic
ID #	Patient Name	Client Name	Breed	Age (Years)	Sex	Weight (kg)	Width of Zygoma	Nasion-Prosthion	Facial Index	Skull Type	R-M-Quad	R-Portion in 5	L-M-Quad	L-Portion in 5	R-D-Quad	R-Portion in 12	L-D-Quad	L-Portion in 12	R-C-M-HR	R-C-M-VR	R-C-M-Area	L-C-M-HR	L-C-M-VR	L-C-M-Area	R-C-D-HR	R-C-D-VR	R-C-D-Area	L-C-D-HR	L-C-D-VR	L-C-D-Area	R-D-RL	L-D-RL
2761	Romeo Rountree	Rountree	Basenji	6	MN	2.63636	90	67.8	132.743	M	2	0	2	0	9,12	0.12474	9,12	0.176471	1.5	2.85	13.4321	1.36	2.4	10.2555	1.5	2.405	11.3348	1.505	2.555	12.0819	10.2	9.62
1204	Coyote Bird Madison	Madison	Huskey	13	M	27.1364	112.11	88.98	125.995	M	2	0	2	0	9,12	0.0722892	9	0	2.885	3.155	28.599	2.29	3.42	24.6075	2.085	4.04	26.4663	2.04	3.48	22.3057	17.7	15.9
103757	Abby Kadane	Kadane	Blue Heeler	7	FS	20.5455	114.9	94.5	121.587	M	2	0	2	0	9	0	9	0	1.95	2.885	17.6761	1.615	2.945	14.9439	1.955	3.45	21.192	1.71	3.305	17.7572	15	15.6
103826	Tango Baca	Baca	Labrador Retriever	4	MN	34.5455	120.9	75.9	159.289	M	1,2	0	1,2	0	9	0	9	0	2.35	3.71	27.3935	2.62	3.65	30.0469	2.845	5.475	48.941	2.27	4.5	32.0955	17.1	17.1
103549	Sasha Schiegel	Schiegel	Labrador Retriever	8	FS	29.4091	115.8	80.1	144.569	M	1,2	0	1,2	0	9,12	0.25	9,12	0.225322	2.705	3.305	28.0896	2.42	3.09	23.4952	2.705	5.4	45.8952	2.405	4.69	35.44	16.2	16.5
683	Kelly Forbes	Forbes	Miniature Pinscher	16	FS	6.51818	78.3	56.7	138.095	M	2,5	0.366795	2,5	0.333333	13	NP	13	NP	1.88	2.59	15.299	1.36	2.295	9.80681	OPEN	OPEN	OPEN	OPEN	OPEN	OPEN	10.4	10
3196	Lucien Rountree	Rountree	Basenji	1	MN	13.7273	96.01	59.4	161.633	M	2	0	2	0	9,12	0.0943396	9, 12	0.210158	1.615	2.105	10.6815	1.53	2.04	9.80681	1.425	3.18	14.238	1.505	2.855	13.5005	13.2	12.9
2963	Zena Rountree	Rountree	Basenji	5	FS	12.1818	95.1	57.6	165.104	M	2	0	2	0	9	0	9	0	1.615	2.12	10.7576	1.415	2.04	9.0697	OPEN	OPEN	OPEN	OPEN	OPEN	OPEN	11.8	11.7
103812	Gus Dominguez	Dominguez	Labrador Retriever	5	MN	29.5455	85.2	76.23	111.767	M	2	0	2	0	9	0	9	0	1.92	3.32	20.0284	2.215	3.69	25.6807	2.33	3.53	25.8426	2.285	3.65	26.2051	20.7	20.5
667	Nirvana Laughlin	Laughlin	Carin Terrier	10	FS	6.31818	83.1	54.9	151.366	M	2	0	2	0	9	0	9	0	2.15	2.44	16.4829	2.185	2.37	16.2707	1.95	2.85	17.4617	2.1	2.855	18.8379	12.3	11.1
805	Alaska Lombardo	Lombardo	Siberian Husky	12	FS	29.2273	105	79	132.911	M	2	0	2	0	9,12	0.128032	9,12	0.0509338	2.35	3.37	24.8831	2.23	3.705	25.9597	2.37	3.71	27.6267	2.285	2.945	21.1435	17.7	17.4
3347	Basil Margetson	Margetson	Labrador Retriever	2	MN	32.7727	103.8	99.69	104.123	M	1,2	0	1,2	0	9	0	9	0	2.085	3.65	23.9114	2.55	3.605	28.8836	2.085	3.945	25.844	2.335	3.605	26.4483	18.9	18.9
3346	Lorna Margetson	Margetson	Labrador Retriever	2	FS	32.3182	115.5	92.1	125.407	M	1,2	0	1,2	0	9	0	9	0	2.285	3.33	23.9076	1.855	3.315	19.3212	2.37	3.48	25.914	2.13	3.355	22.4532	17.8	17.4
3390	Dudley Carmichael	Carmichael	Pembroke Welsh Corgi	5	MN	12.9091	93.6	68.7	136.245	M	2,3	0	2,3	0	13	NP	13	NP	2.35	3.035	22.4095	2.09	3.355	22.0315	OPEN	OPEN	OPEN	OPEN	OPEN	OPEN	15	16.5
3273	Fiona Carmichael	Carmichael	Pembroke Welsh Corgi	7	FS	13.2727	95.7	66.01	144.978	M	2,3	0	2,3	0	13	NP	13	NP	1.88	2.735	16.1555	1.8	2.865	16.2033	OPEN	OPEN	OPEN	OPEN	OPEN	OPEN	14.7	14.7
103885	Nanuk Cordova	Cordova	Siberian Husky	8	MN	33.2273	115.8	84	137.857	M	1,2	0	1,2	0	9	0	9	0	1.95	3.455	21.1684	1.805	3.465	19.6511	4.355	1.825	24.9722	4.96	1.81	28.2076	17.9	18.3
103893	Missy Rogers	Rogers	Blue Heeler	12	FS	25	112.51	79.2	142.058	M	2	0	2	0	9	0	9	0	1.83	3.24	18.6295	1.95	3.09	18.9321	2.12	4.075	27.1437	1.88	4.265	25.1932	16.6	16.2
104007	Maggie Harrison	Harrison	Labrador Retriever	3	FS	21.8636	102.9	76.2	135.039	M	2,5	0.173913	2,5	0.156171	9,12	0.0909091	9,12	0.138889	2.215	3.565	24.8107	1.88	3.97	23.4506	2.55	4.81	38.5382	2.255	5.4	38.2601	13.2	12.9
103881	Jackson Shipp	Shipp	Silky Terrier	9	MN	5.36364	79.21	52.5	150.876	M	2,5	0.5625	2,5	0.645793	9,12	0.525394	9,12	0.522979	1.415	2.4	10.6702	1.415	2.555	11.3594	1.8	2.855	16.1467	2.105	3.155	20.8669	10.2	9.6
103920	O'Rio Burke	Burke	Border Collie	11	MN	13.7273	103.2	73.5	140.408	M	2,5	0.214058	2,5	0.17179	9,12	0.310345	9,12	0.192308	1.65	3.13	16.2269	1.65	2.765	14.3346	2.25	4.35	30.7523	2.4	3.9	29.4091	14.3	13.5
103960	Dexter McFarland	McFarland	West Highland White Terrier	13	MN	7.68182	86.1	67.8	126.991	M	2	0	1,2,3	0	9,12	0.3125	9,12	0.375	2.7	2.7	22.9052	2.85	2.855	25.5657	2.85	2.4	21.4913	2.55	2.4	19.229	12.9	13.5
104031	Enzo Roesch	Roesch	Labrador Retriever	5	MN	25.9091	95.4	87.9	108.532	M	2	0	2	0	9,12	0.0857143	9,12	0.0878004	2.255	3.18	22.531	2.285	3.275	23.5128	2.4	5.25	39.5892	2.555	5.4	43.3502	16.8	16.5
2906	Scotia Stebbins	Stebbins	Border Collie	2	F	17.0909	97.2	76.8	126.562	M	2	0	2	0	9	0	9,12	0.125	1.71	3.355	18.0258	1.675	2.865	15.0781	1.955	4.205	25.8297	2.25	4.8	33.9336	14.1	14.1
104019	Axl Sword	Sword	Golden Retriever	8	MN	31.4091	99.3	93.6	106.09	M	2	0	2	0	9	0	9	0	2.1	3.15	20.7843	1.8	3.15	17.8151	1.755	5.24	28.8945	1.88	4.885	28.8555	18.6	17.1
103999	Gracie Seavey	Seavey	Australian Shepherd	2	FS	13.3182	91.81	66	139.106	M	2	0	2	0	13	NP	13	NP	1.505	2.715	12.8384	1.5	3.155	14.8695	OPEN	OPEN	OPEN	OPEN	OPEN	OPEN	12.6	12.4
104033	Osito Azul Foote	Foote	Australian Shepherd	8	MN	19.6364	107.71	87.3	123.379	M	2	0	2	0	9	0	9	0	2.33	3.155	23.0973	2.105	3.385	22.3881	2.4	4.65	35.0647	2.12	4.205	28.0097	13.8	13.8
104085	Gracie Barrick	Barrick	Australian Shepherd	11	FS	17.5909	95.11	78.9	120.545	M	2	0	2	0	9	0	9	0	1.75	2.765	15.2034	1.955	3.155	19.3799	1.955	4.06	24.939	2.1	4.055	26.7557	13.8	14.4
104043	Badger Cunningham	Cunningham	Norfolk Terrier	4	MN	4.81818	82.5	58.8	140.306	M	2,3	0	2,3	0	13	NP	13	NP	2.37	2.765	20.5897	2.285	2.62	18.8102	OPEN	OPEN	OPEN	OPEN	OPEN	OPEN	11.4	11.1
2730	Kibbles Nutter	Nutter	Bichon Frise	12	MN	8.18182	85.5	61.8	138.35	M	2,5	0.274945	2,5	0.291985	13	NP	13	NP	1.5	2.255	10.6278	1.35	2.62	11.1133	OPEN	OPEN	OPEN	OPEN	OPEN	OPEN	10.8	9.9
104181	Aspen Kunz	Kunz	Golden Retriever	6	FS	31.5909	115.2	92.4	124.675	M	2	0	2	0	9	0	9	0	2.295	3.76	27.1129	2.855	3.61	32.3832	2.3	4.06	29.34	2.255	4.055	28.7305	16.5	16.2
2321	Valentina Gandert	Gandert	Cairn Terrier	13	F	5.36364	73.5	47.7	154.088	M	1,2	0	1,2	0	9,12	0.454545	9,12	0.409091	1.8	1.95	11.0284	1.8	1.8	10.1801	1.95	3.3	20.2188	2.105	3.3	21.8259	10	10.1
103947	Hollee Alcala	Alcala	Bichon Frise	7	FS	9.04545	82.51	50	165.02	M	2	0	2,5	0.111111	13	NP	13	NP	1.65	2.555	13.2459	1.8	2.7	15.2701	OPEN	OPEN	OPEN	OPEN	OPEN	OPEN	9.8	10
2441	Grace Marshall	Marshall	Visla	8	FS	23	104.1	94.58	110.066	M	2	0	1,2	0	9	0	9	0	1.655	3.465	18.018	2.1	3.45	22.7638	2.25	3.76	26.5813	2.1	4.055	26.7557	17.7	17.4
104134	Tesla Ferrara	Ferrara	German Shorthaired Pointer	3	FS	30.9	105.9	79.21	133.695	M	2	0	2	0	13	NP	13	NP	1.83	3.275	18.8308	2.085	3.275	21.4548	OPEN	OPEN	OPEN	OPEN	OPEN	OPEN	16.6	16
104158	Brandy Otero	Otero	Labrador Retriever	7	F	31.1	114.3	81	141.111	M	1,2	0	1,2	0	9,12	0.05	9,12	0.1	1.5	3.42	16.1185	1.34	3.18	13.3887	1.805	3.3	18.7153	1.805	3	17.0139	16.5	15.5
3112	Starsky Cochrane	Cochrane	Siberian Husky	10	MN	39.0909	103.8	96.32	107.766	M	1,2	0	1,2	0	9,12	0.0367123	9,12	0.0894188	1.95	2.85	17.4617	2.1	3.005	19.8276	2.1	3.09	20.3884	1.955	3.355	20.6085	18.2	18.1
104222	Mossy Gonzales	Gonzales	Labrador Retriever	2	MN	37.9091	107.41	92.7	115.868	M	2	0	2	0	9	0	9	0	2.4	3.6	27.1469	1.955	3.605	22.1441	2.405	4.205	31.7751	2.555	4.65	37.3293	20.4	19.8
104182	Angus Maggio	Maggio	Australian Shepherd	7	MN	22.6	106.8	78.6	135.878	M	2	0	2	0	9,12	0.176667	9,12	0.15	2.27	3.455	24.6422	2.405	3.61	27.279	2.85	6	53.7282	2.85	6	53.7282	16	16.8
104109	Decker Divine	Divine	Catahoula Leopard Dog	1	MN	32.4545	116.42	98.4	118.313	M	2	0	2	0	9	0	9	0	1.975	3.65	22.6499	2.255	3.905	27.6677	2.105	4.2	27.7784	1.95	4.5	27.571	18	18
104156	Chip Tennant	Tennant	Australian Shepherd	9	MN	24.9545	94.8	78.9	120.152	M	1,2,5	0.287234	1,2,5	0.22973	9,12	0.151515	9,12	0.218295	1.955	3.465	21.2841	2.105	3.33	22.0243	3	4.95	46.6587	2.85	4.81	43.0721	15.4	15.5
	END

## Sheet: Brachycephalic
ID #	Patient Name	Client Name	Breed	Age	Sex	Weight (kg)	Width of Zygoma	Nasion-Prosthion	Facial Index	Skull Type	R-M-Quad	R-Portion in 5	L-M-Quad	L-Portion in 5	R-D-Quad	R-Portion in 12	L-D-Quad	L-Portion in 12	R-C-M-HR	R-C-M-VR	R-C-M-Area	L-C-M-HR	L-C-M-VR	L-C-M-Area	R-C-D-HR	R-C-D-VR	R-C-D-Area	L-C-D-HR	L-C-D-VR	L-C-D-Area	R-D-RL	L-D-RL
103796	Gemma Townsend	Townsend	American Pit Bull Terrier	1	FS	23.3182	122.1	71.4	171.008	B	2	0	2	0	9	0	9	0	2.09	2.42	15.8916	1.81	2.405	13.6773	2.09	3.48	22.8524	2.285	3.925	28.1794	14.1	14.4
103730	Biscochita Wolfe	Wolfe	Chihuahua	8	FS	2.9	72.01	36.6	196.749	B	2,5	0.191919	2,5	0.241715	13	NP	13	NP	1.755	2.475		1.425	2.565		OPEN	OPEN	OPEN	OPEN	OPEN	OPEN	9	8.7
104496	Fletcher Mowery	Mowery	Staffordshire Terrier	2	MN	29.5455	125.7	76	165.395	B	2	0	2	0	9	0	9	0	2.27	3.63		2.57	3.6		2.855	5.27	47.2741	2.555	5.25	42.146	14.4	14.1
104413	Mora Hunter	Hunter	Pitbull	6	FS	20.3636	118	73	161.644	B	2	0	2	0	9	0	9	0	1.62	3.32		2.4	3.3		OPEN	OPEN	OPEN	OPEN	OPEN	OPEN	14.4	14.4
103848	Bluebell Nickerson	Nickerson	Pitbull Mix	5	FS	18.8636	116.7	45.3	257.616	B	2,5	0.107588	2,5	0.109223	9	0	9	0	2.15	4.415		2.27	4.12		2.37	4.71	35.0732	2.42	4.985		12.4	13.8
103798	Isabella Saladino	Saladino	Chihuahua	7	FS	4.36364	69.61	27.9	249.498	B	2,5	0.620567	2,5	0.604478	13	NP	13	NP	1.565	1.975		2.185	2.185		OPEN	OPEN	OPEN	OPEN	OPEN	OPEN	7.8	7.8
103837	Dotti Alderette	Alderette	Boxer	8	FS	22.9545	108.9	50.7	214.793	B	2	0	2	0	9	0	9	0	2.12	4.2		2.4	4.96		OPEN	OPEN	OPEN	OPEN	OPEN	OPEN	13.4	13.1
103747	Paco Garcia	Garcia	Shih Tzu Mix	2	MN	5.86364	79.21	26.7	296.667	B	2,5	0.729211	2,5	0.475248	13	NP	13	NP	1.5	2.555		1.65	2.405		OPEN	OPEN	OPEN	OPEN	OPEN	OPEN	10.2	9.6
103916	Lincoln Zamora	Zamora	Shih Tzu	1	M	6.36364	80.7	23.4	344.872	B	2,5	0.560175	2,5	0.560175	13	NP	13	NP	2.43	2.23		2.255	2.285		OPEN	OPEN	OPEN	OPEN	OPEN	OPEN	9.6	8.8
103899	George Robles	Robles	Rottweiler Mix	6	MN	32.1364	117	60	195	B	2	0	2	0	9	0	9	0	2.555	3.06		2.25	2.7		2.405	3.455		2.25	3.91		15.9	14.4
103938	Fenway Fitzgerald	Fitzgerald	Boston Terrier	9	FS	14.1364	102.31	26.4	387.538	B	1,2	0	1,2	0	13	NP	13	NP	3.32	2.57		3.23	3.015		OPEN	OPEN	OPEN	OPEN	OPEN	OPEN	10.5	11.4
3382	Missy Lowe	Lowe	Peekapoo	12	FS	8.51364	78	37.8	206.349	B	2,5	0.363071	2,5	0.304878	13	NP	13	NP	2.405	3.005		2.4	3		OPEN	OPEN	OPEN	OPEN	OPEN	OPEN	10.2	10.2
103939	Zelda Stumpf	Stumpf	Pitbull Mix	5	FS	29.8182	121.8	71.7	169.874	B	2	0	2	0	9	0	9	0	2.4	3.45		2.4	3.605		2.555	4.65		2.1	5.11		14.1	15
103833	Chex Jones	Jones	Terrier Mix	4	MN	6.01818	85.8	39.9	215.038	B	2,5	0.382979	2,5	0.375618	13	NP	13	NP	2.105	2.405		2.33	2.44		OPEN	OPEN	OPEN	OPEN	OPEN	OPEN	10.8	10.5
103969	Taz Diaz	Diaz	American Pit Bull Terrier	1	M	23.3182	120.9	42.9	281.818	B	2	0	1,2	0	13	NP	13	NP	1.95	2.105		2.405	3.755		OPEN	OPEN	OPEN	OPEN	OPEN	OPEN	14.7	13.5
103981	Emma Sawtelle	Sawtelle	Chihuahua	11	FS	3.45455	102.7	28.8	356.597	B	6	0	6	0	13	NP	13	NP	1.615	2.33		1.675	2.33		OPEN	OPEN	OPEN	OPEN	OPEN	OPEN	8.4	7.5
104002	Haven Passmore	Passmore	Cavalier King Charles Spaniel	4	FS	5.59091	78.31	36.3	215.73	B	13	NP	13	NP	13	NP	13	NP	OPEN	OPEN	OPEN	OPEN	OPEN	OPEN	OPEN	OPEN	OPEN	OPEN	OPEN	OPEN	9.3	9.3
104439	Raimy Perlstein	Perlstein	French Bulldog	10	MN	12.4091	110	21	523.81	B	2	0	2	0	13	NP	13	NP	OPEN	OPEN	OPEN	OPEN	OPEN	OPEN	OPEN	OPEN	OPEN	OPEN	OPEN	OPEN	12.6	11.7
103980	Buster Shinn	Shinn	Chihuahua Mix	12	MN	3.21818	66.01	30	220.033	B	2,5	0.57554	2,5	0.555249	13	NP	13	NP	1.615	1.55333		1.5	2.42		OPEN	OPEN	OPEN	OPEN	OPEN	OPEN	7	6.6
104111	Milo Konker	Konker	Shih Tzu	1	MN	6.7	86.4	33	261.818	B	2	0	2	0	9,12	0.588235	9,12	0.503119	1.8	2.25		1.805	3.165		2.7	2.55		2.555	2.405		11.1	11.1
104054	Toshi Wilson	Wilson	Boston Terrier	4	MN	11.5	99.6	30.91	322.226	B	2,3	0	2,3	0	13	NP	13	NP	OPEN	OPEN	OPEN	OPEN	OPEN	OPEN	OPEN	OPEN	OPEN	OPEN	OPEN	OPEN	11.4	11.4
104432	Samson Valdez	Valdez	English Mastiff	1	MN	54	124	72	172.222	B	2	0	1,2	0	9	0	9	0	1.75	5.095		1.83	4.885		2.4	5.55		2.7	5.86		15.6	14.7
104135	Cooper Knoll	Knoll	Pitbull	6	MN	36.5	124.8	80.7	154.647	B	2	0	2,3	0	9	0	9	0	1.92	3.75		2.02	3.22		2.55	3.45		2.42	3.61		20.7	21.5
104140	Reba Frisch	Frisch	Chihuahua	5	FS	4.59091	66.3	33.9	195.575	B	2,5	0.707124	2,5	0.707182	13	NP	13	NP	1.425	2.12		1.28	2.37		OPEN	OPEN	OPEN	OPEN	OPEN	OPEN	7.8	7.9
104137	Mali Corrie	Corrie	American Pit Bull Terrier	3	FS	32.9091	136.8	61.51	222.403	B	2	0	2	0	9	0	9	0	2.42	3.945		2.85	3.48		OPEN	OPEN	OPEN	OPEN	OPEN	OPEN	16.3	16.3
104149	Rupert Gamboa	Gamboa	American Bulldog	2	MN	33.7727	147.31	65.7	224.216	B	2	0	2	0	9	0	9	0	3.305	4.41		3.295	4.27		OPEN	OPEN	OPEN	OPEN	OPEN	OPEN	15	17.7
104148	Tinker Kupay	Kupay	Terrier Mix	7	FS	4.16364	74.12	26.1	283.985	B	2,5	0.584711	2,5	0.5	13	NP	13	NP	2.27	2.27		2.4	2.25		OPEN	OPEN	OPEN	OPEN	OPEN	OPEN	9.9	9
104406	Olive Hinton	Hinton	Cavalier King Charles Spaniel	9	FS	7.36364	90	33	272.727	B	1,2,3	0	1,2,3	0	13	NP	13	NP	3	4.205		3.005	4.05		OPEN	OPEN	OPEN	OPEN	OPEN	OPEN	10.8	10.2
2492	Scarlet Bair	Bair	Cavalier King Charles Spaniel	9	F	6.5	84.3	31.81	265.011	B	2,3	0	2,3	0	13	NP	13	NP	2.515	3.455		2.62	3.76		OPEN	OPEN	OPEN	OPEN	OPEN	OPEN	9.9	9.9
3148	Princess Hardening	Hardening	Chihuahua	8	FS	6.35909	74.7	44.4	168.243	B	2,5	0.49863	2,5	0.371094	13	NP	13	NP	1.415	1.895		1.385	2.04		OPEN	OPEN	OPEN	OPEN	OPEN	OPEN	8.7	8.1
103930	Reno Littles	Littles	Pitbull	7	MN	22.7	129	75	172	B	1,2	0	2	0	9	0	9	0	2.15	3.005		2.25	3.005		OPEN	OPEN	OPEN	OPEN	OPEN	OPEN	17.9	18
104232	Emmit Schaefer	Schaefer	Chihuahua	11	MN	4.65909	67.51	39.3	171.781	B	2,5	0.617143	2,5	0.604478	13	NP	13	NP	1.65	2.1		1.65	2.4		OPEN	OPEN	OPEN	OPEN	OPEN	OPEN	9	8.7
104234	Bonnie Harris	Harris	Chihuahua	12	FS	2.38182	59.41	29.4	202.075	B	13	NP	13	NP	13	NP	13	NP	OPEN	OPEN	OPEN	OPEN	OPEN	OPEN	OPEN	OPEN	OPEN	OPEN	OPEN	OPEN	5.4	6.3
104131	Mahea Alvidrez	Alvidrez	Pitbull	5	FS	27.5727	124.5	73.82	168.653	B	2	0	2	0	9	0	9	0	2.4	3.605		2.865	3.455		2.37	4.67		2.55	5.62		19.5	16.8
1187	Chanelle Sylvia	Sylvia	Chow Chow	7	FS	22.6455	107.4	66.6	161.261	B	1,2	0	2	0	9	0	9	0	2.1	4.2		2.15	4.355		OPEN	OPEN	OPEN	OPEN	OPEN	OPEN	14.4	14.4
104268	Ariana Rizzo	Rizzo	Chihuahua	12	FS	2.07273	64.82	35.1	184.672	B	2,5	0.241877	2,5	0.484375	13	NP	13	NP	1.53	1.36		1.675	2.47		OPEN	OPEN	OPEN	OPEN	OPEN	OPEN	8.3	8.4
104104	Morgana Magpie Saladino	Saladino	Chihuahua	10	FS	4.04545	67.2	33.3	201.802	B	2,5	0.438596	2,5	0.409836	13	NP	13	NP	1.505	1.805		1.53	1.95		OPEN	OPEN	OPEN	OPEN	OPEN	OPEN	7.5	8.1
104297	Rufus Romero	Romero	Boston Terrier	2	M	12.3182	104	33.91	306.694	B	1,2	0	2	0	13	NP	13	NP	2.8	3.53		2.475	4.12		OPEN	OPEN	OPEN	OPEN	OPEN	OPEN	11.1	10.5
104301	Elsie Harris	Harris	Chihuahua	8	FS	2.99545	66.61	36.6	181.995	B	2,5	0.391813	2,5	0.501548	13	NP	13	NP	1.05	1.65		1.14	1.95		OPEN	OPEN	OPEN	OPEN	OPEN	OPEN	8.1	8.1
104325	Coco Romero	Romero	Shih Tzu	2	MN	9.40909	86.11	38.7	222.506	B	2,5	0.24902	2,5	0.17179	13	NP	13	NP	2.55	2.7		2.55	2.85		OPEN	OPEN	OPEN	OPEN	OPEN	OPEN	12.6	11.4
	END

## Sheet: Dolichocephalic
ID #	Patient Name	Client Name	Breed	Age (Years)	Sex	Weight (kg)	Width of Zygoma	Nasion-Prosthion	Facial Index	Skull Type	R-M-Quad	R-Portion in 5	L-M-Quad	L-Portion in 5	R-D-Quad	R-Portion in 12	L-D-Quad	L-Portion in 12	R-C-M-HR	R-C-M-VR	R-C-M-Area	L-C-M-HR	L-C-M-VR	L-C-M-Area	R-C-D-HR	R-C-D-VR	R-C-D-Area	L-C-D-HR	L-C-D-VR	L-C-D-Area	R-D-RL	L-D-RL
3282	Annie Campbell	Campbell	Dachshund	11	FS	8.59091	75.9	78.3	96.9349	D	2,5	0.601266	2,5	0.604966	13	NP	13	NP	1.71	2.735	14.6947	1.85	2.91	16.915	OPEN	OPEN	OPEN	OPEN	OPEN	OPEN	9.6	9.4
3283	Sergio Campbell	Campbell	Dachshund	9	MN	6.36364	78.9	80.7	97.7695	D	2,5	0.601266	2,5	0.604966	13	NP	13	NP	1.71	2.735	14.6947	1.8	1.275	7.21089	OPEN	OPEN	OPEN	OPEN	OPEN	OPEN	11.7	11.1
103800	Junior Furlong	Furlong	Doberman Pinscher	7	MN	41.3636	99.6	119.4	83.4171	D	2	0	2	0	9	0	9	0	2.55	4.05	32.449	2.55	3.9	31.2472	2.415	4.265	32.3625	2.25	3.97	28.0659	13.2	13.5
103728	Logan Crone	Crone	Anatolian/Great Pyrenese	1	M	38.8182	101.1	107.7	93.8719	D	2	0	2	0	9	0	9	0	2	3.825	24.0363	2.405	3.465	26.1833	2.7	6.45	54.7179	2.7	5.865	49.7551	17.5	17.8
103781	Penny Plath	Plath	Doberman Pinscher	4	FS	30.4091	90	107.7	83.5655	D	1,2	0	1,2	0	9	0	9	0	2	3.65	22.9366	2.25	3.895	27.5357	2.1	4.8	31.6714	2.25	4.06	28.7022	15.7	15
103834	Henry Rubidoux	Rubidoux	Dachshund	2	MN	14.8182	85.8	76.2	112.598	D	2,5	0.317726	2,5	0.339286	9,12	0.25	9,12	0.211694	2.1	2.99	19.7286	1.975	2.8	17.3753	2.105	4.8	31.7468	2.105	4.96	32.805	12.9	12
2701	Abbey Richter-Sand	Richter-Sand	Whippet	6	FS	16	95.1	85.8	110.839	D	2	0	2	0	9,12	0.0878906	9,12	0.120968	1.2	2.705	10.1989	1.425	3.035	13.5888	1.805	5.12	29.0371	1.53	4.96	23.844	13.5	14.1
3138	Katie (Katrina Rose) Gima	Gima	Greyhound	6	FS	27.6818	77.4	101.4	76.3314	D	2	0	2	0	9	0	9	0	1.53	3.285	15.7918	1.21	3.015	11.4625	1.955	3.005	18.4585	1.95	3	18.3807	13.8	13.2
103862	Nacho Gonzales	Gonzales	Standard Poodle	9	FS	21.9545	93.3	97.5	95.6923	D	1,2,5	0.140406	1,2,5	0.0971014	9,12	0.259259	9, 12	0.49936	2.405	3.315	25.0498	2.27	3.755	26.7819	2.4	4.05	30.5402	2.27	3.905	27.8518	15	15
103906	Giselle Auguston	Auguston	Whippet	7	FS	12.4545	90.6	80.4	112.687	D	2,5	0.410959	2,5	0.133038	9,12	0.249406	9, 12	0.358734	1.05	2.855	9.41893	1.2	2.715	10.2366	1.5	4.21	19.8417	1.65	4.275	22.1629	12.3	12.3
103917	Kenzie Walton	Walton	Great Dane	4	FS	36.6818	101.71	110.4	92.1286	D	2	0	2	0	9	0	9	0	1.88	3.945	23.303	1.8	3.605	20.3884	2.475	4.69	36.4716	2.4	4.835	36.4598	16.5	16.8
103975	Gus Bowen	Bowen	Dachshund	8	MN	6.5	77.1	64.8	118.981	D	2,5	0.522979	2,5	0.503003	9,12	0.599781	9,12	0.379388	1.8	3.005	16.9951	1.95	3.305	20.2494	2.865	4.56	41.0483	2.91	4.415	40.3673	11.7	11.4
103846	Titan Roller	Roller	Belgian Tervuren	9	MN	24.7273	88.2	107.1	82.3529	D	2	0	2	0	9	0	9	0	2.27	3.155	22.5025	1.565	3.275	16.1039	1.955	3.63	22.2977	1.805	3.33	18.8855	15.3	14.1
103847	Tris Roller	Roller	Belgian Tervuren	2	FS	19.5455	82.5	98.1	84.0979	D	1,2	0	1,2	0	9,12	0.0583333	9,12	0.15894	2.04	3.305	21.184	1.65	3.3	17.1082	2.105	3.605	23.8431	1.65	3.48	18.0414	13.2	13.5
104029	Enzo Brosha	Brosha	Italian Greyhound	2	MN	9.31818	84	72.6	115.702	D	2,5	0.617143	2,5	0.483582	13	NP	13	NP	1.425	2.405	10.768	1.475	2.15	9.96407	OPEN	OPEN	OPEN	OPEN	OPEN	OPEN	10.5	10.2
3216	Aldo Leo	Leo	Standard Poodle	7	MN	32.3182	81.9	109.5	74.7945	D	2,5	0.2	2,5	0.26087	9,12	0.208333	9,12	0.148148	2.42	3.15	23.9515	1.955	3.3	20.2706	2.42	3.755	28.5517	2.1	4.055	26.7557	13.5	12.9
3215	Lucy Leo	Leo	Standard Poodle	12	FS	25.1364	86.7	102.6	84.5029	D	2	0	2	0	9,12	0.181818	9,12	0.165333	1.8	3.755	21.2368	1.5	3.3	15.5529	2.255	3.3	23.3812	2.66	3.75	31.3415	15	14.1
104084	Tucker Segarra	Segarra	English Setter	10	MN	28.9545	83.1	111	74.8649	D	1,2	0	1,2	0	9	0	9	0	2.42	3.24	24.6358	2.25	3.005	21.2438	2.1	3.6	23.7535	2.255	3.5	24.7982	16.2	16.5
3011	Max Bretz	Bretz	German Shepherd / Doberman	3	MN	48.5909	99	104.4	94.8276	D	2	0	2	0	9	0	9	0	1.95	4.095	25.0897	1.8	3.61	20.4167	2.105	3.755	24.8352	2.2	4	27.6496	15.6	15
104155	Zipper Henline	Henline	Welsh Terrier	9	FS	8.18182	78.9	83.7	94.2652	D	2	0	1,2	0	9	0	9	0	1.655	2.42	12.584	1.655	2.1	10.92	1.65	2.855	14.8012	1.655	2.735	14.222	11.1	12.3
104169	Abby Ickes	Ickes	Basset Hound	6	FS	25.3182	91.8	95.4	96.2264	D	2,5	0.403683	2,5	0.392811	9	0	9,12	0.107143	2.7	3.53	29.9464	2.555	3.895	31.2683	2.4	3.9	29.4091	2.44	4.2	32.1992	18.3	18
104173	Sally Coker	Coker	Basset Hound	1	FS	21.2	87.3	92.71	94.1646	D	2,5	0.357482	1,2,5	0.58172	9,12	0.518857	9,12	0.53125	2.285	4.21	30.2256	1.825	4.65	26.6638	2.705	4.375	37.1836	2.7	4.8	40.7203	14.6	13.8
104150	Finn Fischer	Fischer	Italian Greyhound	7	MN	7.81364	68.4	74.1	92.3077	D	2,5	0.532151	2,5	0.614191	9,12	0.427892	9,12	0.522979	1.425	2.255	10.0964	1.2	2.255	8.50225	1.655	3.155	16.406	1.655	3.155	16.406	11.8	11.5
104106	Eddie Cruz Marquez	Marquez	Italian Greyhound	14	MN	6.15	69.6	69.91	99.5566	D	2,5	0.767157	2,5	0.691429	13	NP	13	NP	1.36	2.4	10.2555	1.35	2.255	9.56503	OPEN	OPEN	OPEN	OPEN	OPEN	OPEN	9.9	9.9
104271	Sheba of Greyhound Companions of New Mexico	of Greyhound Companions of New Mexico	Greyhound	7	F	29.7591	94.8	103.53	91.5677	D	1,2	0	1,2	0	9,12	0.047619	9,12	0.232198	1.36	3.165	13.5244	1.655	2.885	15.002	1.8	2.855	16.1467	1.65	3.155	16.3565	13.6	12.7
104824	Cooper Macal	Macal	Golden/Poodle	5	MN	25.5455	105	114	92.1053	D	1,2	0	1,2	0	8,9,12	0.26087	8,9,12	0.226244	1.895	3.985	23.727	1.895	3.94	23.4591	2.4	4.8	36.1958	2.4	4.8	36.1958	18	18
104283	Luke Walsh	Walsh	Standard Poodle	8	MN	30.4091	79.5	108	73.6111	D	1,2	0	1	0	9,12	0.434562	9,12	0.457064	1.14	3.845	13.7723	1.655	3.165	16.458	1.755	3.75	20.6783	1.675	4.095	21.5514	16.2	16.8
104350	Sally Johnson	Johnson	Basset Hound	7	FS	25.7727	104	83.04	125.241	D	2	0	2	0	9	0	9	0	2.1	3.61	23.8195	1.805	3.455	19.5944	2.55	5.85	46.8708	2.405	6.315	47.7194	13.2	13.5
104340	Katie Premack	Premack	Dachshund	9	FS	5.24545	70.8	54.9	128.962	D	2,5	0.247573	2,5	0.157895	13	NP	13	NP	1.955	3.165	19.4414	1.505	3.005	14.2098	OPEN	OPEN	OPEN	OPEN	OPEN	OPEN	10.8	9.6
104471	Arabella Klinkowski	Klinkowski	Italian Greyhound	4	FS	10.6818	78	65.1	119.816	D	2,5	0.705882	2,5	0.705882	13	NP	13	NP	1.545	2.57	12.4758	1.5	2.755	12.9843	OPEN	OPEN	OPEN	OPEN	OPEN	OPEN	10.2	10.5
104431	Tavi Hoshen	Hoshen	Saluki	8	M	23.6818	79	108	73.1481	D	2,5	0.14827	2,5	0.176471	9,12	0.246711	9,12	0.427469	1.28	2.91	11.7033	1.825	3.355	19.2381	1.65	3.24	16.7971	2.105	3.15	20.8338	16.8	16.2
2601	Ziggy Stalzer	Stalzer	Miniature Dachshund	9	MN	5	79.5	60.9	130.542	D	2,5	0.616872	2,5	0.508929	13	NP	13	NP	1.565	2.705	13.3011	2.185	2.705	18.5706	OPEN	OPEN	OPEN	OPEN	OPEN	OPEN	10.8	10.2
3137	Molly Gima	Gima	Greyhound	11	FS	29.9545	72.3	105	68.8571	D	1,2,5	0.61478	1,2,5	0.650794	9,12	0.566667	9,12	0.428571	1.005	3.53	11.1467	1.28	3.605	14.4984	1.2	4.2	15.8357	1.505	4.205	19.8842	15.7	16.9
104611	Dylan Ferrel	Ferrel	Welsh Terrier	8	MN	7.68182	80	86	93.0233	D	1,2	0	2	0	9	0	9	0	1.81	2.8	15.9237	1.6	3.025	15.2073	1.81	3.225	18.3406	2.21	2.8	19.4427	14.8	15.2
103701	Jean-Luc Brosha	Brosha	Italian Greyhound	7	MN	11.9227	81	87	93.1034	D	2,5	0.727273	2,5	0.731818	9,12	0.55	9,12	0.611111	1.4	2.2	9.67736	1.215	2.2	8.39857	2	4.045	25.4188	1.6	3.805	19.1285	10.8	10
104661	Arlo Morgan	Morgan	Collie	12	MN	26.1818	89.2	114.4	77.972	D	1,2	0	1,2	0	9	0	9	0	1.8	2.975	16.8254	1.71	2.8	15.0439	2.04	3.425	21.9532	2	2.805	17.6266	15.2	15.6
104725	Bella Perrone	Perrone	Standard Poodle	5	FS	17.7273	76	115	66.087	D	2,5	0.368421	1,2,5	0.332871	9,12	0.544343	9,11,12	0.456376	1.415	3.82	16.9835	1.415	3.405	15.1384	2.2	5.035	34.8039	4.81	2.02	30.5283	17.7	17.6
104726	Bohdi Perrone	Perrone	Standard Poodle	5	M	19	88	102	86.2745	D	2	0	2	0	9,12	0.189573	9,12	0.188457	1.4	3.005	13.2184	1.8	3.205	18.1262	2.4	4.405	33.2172	1.81	4.02	22.8618	15.2	16
104637	Benjamin Hasenbank	Hasenbank	Rough Coated Collie	7	M	28.1364	not taken	Not taken		D	1	0	1	0	9,11	0	9	0	1.415	2.805	12.4708	1.2	2.41	9.08666	1.6	2.83	14.227	1.61	2.53	12.7983	15.6	16
103854	Domino Stewart	Stewart	Borzoi	7	M	35.3182	not taken	Not taken		D	1	0	1	0	7,8,9,11	0	7,8,9,11	0	1.35	3.3	13.9976	1.35	3.315	14.0612	1.65	3.305	17.1341	1.65	3.305	17.1341	15.6	15.11
	2019-12-01	END

## Sheet: Legend 
R-C-M-HR	Right Infraorbital Canal Mesial Horizontal Radius		DC-C	Direct contact with canal
R-C-M-VR	Right Infraorbital Canal Mesial Vertical Radius		DC-S	Direct contact with sinus
R-C-M-area	Right Infraorbital Canal Mesial Area		DC-O	Direct contact with suborbital space
R-M-Quad	Right Infraorbital Canal Mesial Sits in Which Quad		NP	No possible contact
R Portion in 5	Right Infraorbital Canal Mesial Area/% in Quad #5		Y	Yes direct contact
R-C-D-HR	Right Infraorbital Canal Distal Horizontal Radius		N	No direct contact, but there are mm from root to site
R-C-D-VR	Right Infraorbital Canal Distal Vertical Radius		R-D-RL	Right distal Root Length
R-C-D-area	Right Infraorbital Canal Distal Area		L-D-RL	Left distal Root Length
R-D-Quad	Right Infraorbital Canal Distal Sits in Which Quad		Quad 1-6	See Chart
R-Portion in 6	Right Infraorbital Canal Distal Area/% in Quad #6		13 or Quad 13	Caudal to Maxillary Foreman
L-C-M-HR	Left Infraorbital Canal Mesial Horizontal Radius
L-C-M-VR	Left Infraorbital Canal Mesial Vertical Radius
L-C-M-area	Left Infraorbital Canal Mesial Area
L-M-Quad	Left Infraorbital Canal Mesial Sits in Which Quad
L-Portion in 5	Left Infraorbital Canal Mesial Area/% in Quad #5
L-C-D-HR	Left Infraorbital Canal Distal Horizontal Radius
L-C-D-RV	Left Infraorbital Canal Distal Vertical Radius
L-C-D-area	Left Infraorbital Canal Distal Area
L-D-Quad	Left Infraorbital Canal Distal Sits in Which Quad
L-Portion in 12	Left Infraorbital Canal Distal Area/% in Quad #12
