# Supplementary material for: Analysis of the anatomic relationship of the infraorbital canal with the roots of the maxillary fourth premolar tooth in the three different skull types: Mesocephalic, brachycephalic, and dolichocephalic, using cone beam computed tomography
Source: Front Vet Sci. 2022 Oct 4;9:978400. doi: 10.3389/fvets.2022.978400 (PMC9577602; doi:10.3389/fvets.2022.978400)
Supplement: Supplementary file 2 [file Table_2.XLSX]

## Sheet: 08.08.2022
Statistical Methods:
The continuous data was desribed using means and standard deviation. The data was evaluated for normality and if not met was analyzed using Kruskal-Wallis test to compare 3 groups. Correlation between 2 continuous data was analyzed using Pearson's correlation coefficient. A p-value of 0.05 was used to evaluate statistical significance. SAS v9.4 (SAS Institute Inc., Cary, NC) was used for all stat…
Results:
1. Is there a difference in the skull types with the position of the infraorbital canal in relationship to the roots of the maxillary fourth premolar based on the grid system create by author?
a. The quadrants are based off of the mesial roots and the distal root.
i. Brachycephalic vs Mesaticephalic vs Dolichocephalic
ii. Brachycephalic vs Mesaticephalic
iii. Brachycephalic vs. Dolichocephalic
iv. Mesaticephalic vs. Dolichocephalic
Mesial roots:
Skull_Types	M_Quad
	1	1,2	1,2,3	1,2,5	13	2	2,3	2,5	6	Total
B	0	7	2	0	4	28	5	32	2	80
D	5	15	0	6	0	22	0	32	0	80
M	0	17	1	2	0	43	6	11	0	80
Total	5	39	3	8	4	93	11	75	2	240
Distal roots:
Skull_Types	D_Quad
	13	7,8,9,11	8,9,12	9	9, 12	9,11	9,11,1	9,12	Total
B	50	0	0	28	0	0	0	2	80
D	14	2	2	26	2	1	1	32	80
M	16	0	0	34	1	0	0	29	80
Total	80	2	2	88	3	1	1	63	240
b. Is there any correlation with body weight, sex, breed, age with the skull type and location of the infraorbital canal in relationship to the mesial roots and distal roots?
Body weight:
Analysis Variable : Weight__kg_
Skull_Types	N	Mean	Median	95% Confidence Limits of Mean		Std Dev	Std Error	Minimum	Maximum
Brachycephalic	40	14.7075	8.96	10.7223	18.6927	12.4611	1.97027	2.07	54
Dolichocephalic	40	21.2725	22.815	17.6558	24.8892	11.3088	1.78807	5	48.59
Mesaticephlic	40	20.8977	22.23	17.4735	24.322	10.7071	1.69294	2.64	39.09
Mesial roots:
Analysis Variable : Weight__kg_
M_Quad	N	Mean	Median	95% Confidence limits of mean		Std Dev	Std Error	Minimum	Maximum
1	5	31.466	30.41	26.9486	35.9834	3.63821	1.62706	28.14	35.32
1,2	39	26.3846	29.41	23.1353	29.634	10.0239	1.6051	5.36	54
1,2,3	3	7.46667	7.36	7.00772	7.92562	0.184752	0.106667	7.36	7.68
1,2,5	8	24.0787	23.45	20.5021	27.6554	4.27816	1.51256	17.73	29.95
13	4	3.985	3.985	1.036	6.934	1.85329	0.926647	2.38	5.59
2	93	24.4206	25	22.273	26.5683	10.428	1.08134	2.64	54
2,3	11	12.2273	11.5	6.33727	18.1173	8.76737	2.64346	4.82	36.5
2,5	75	9.60533	6.5	7.98496	11.2257	7.0427	0.813221	2.07	32.32
6	2	3.45	3.45	.	.	0	0	3.45	3.45
Distal roots:
Analysis Variable : Weight__kg_
D_Quad	N	Mean	Median	95% Confidence limits of mean		Std Dev	Std Error	Minimum	Maximum
13	80	8.1205	6.36	6.88148	9.35952	5.56764	0.622482	2.07	30.9
7,8,9,11	2	35.32	35.32	.	.	0	0	35.32	35.32
8,9,12	2	25.55	25.55	.	.	0	0	25.55	25.55
9	88	27.7508	28.545	25.7174	29.7842	9.59706	1.02305	6.32	54
9, 12	3	16.0433	13.73	3.2371	28.8496	5.1552	2.97636	12.45	21.95
9,11	1	28.14	28.14	.	.	.	.	28.14	28.14
9,11,1	1	17.73	17.73	.	.	.	.	17.73	17.73
9,12	63	19.7265	21.2	17.3078	22.1452	9.60373	1.20996	2.64	39.09
Sex:
Skull_Types	Sex
	F	FS	M	MN	Total
Brachycephalic	1	22	3	14	40
Dolichocephalic	1	17	5	17	40
Mesaticephlic	3	16	1	20	40
Total	5	55	9	51	120
Breed:
Breed	Skull_Types
	Brachycephalic	Dolichocephalic	Mesaticephlic	Total
American Bulldog	1	0	0	1
American Pit Bull Te	3	0	0	3
Anatolian/Great Pyre	0	1	0	1
Australian Shepherd	0	0	5	5
Basenji	0	0	3	3
Basset Hound	0	3	0	3
Belgian Tervuren	0	2	0	2
Bichon Frise	0	0	2	2
Blue Heeler	0	0	2	2
Border Collie	0	0	2	2
Borzoi	0	1	0	1
Boston Terrier	3	0	0	3
Boxer	1	0	0	1
Cairn Terrier	0	0	1	1
Carin Terrier	0	0	1	1
Catahoula Leopard Do	0	0	1	1
Cavalier King Charle	3	0	0	3
Chihuahua	10	0	0	10
Chihuahua Mix	1	0	0	1
Chow Chow	1	0	0	1
Collie	0	1	0	1
Dachshund	0	5	0	5
Doberman Pinscher	0	2	0	2
English Mastiff	1	0	0	1
English Setter	0	1	0	1
French Bulldog	1	0	0	1
German Shepherd / Do	0	1	0	1
German Shorthaired P	0	0	1	1
Golden Retriever	0	0	2	2
Golden/Poodle	0	1	0	1
Great Dane	0	1	0	1
Greyhound	0	3	0	3
Huskey	0	0	1	1
Italian Greyhound	0	5	0	5
Labrador Retriever	0	0	9	9
Miniature Dachshund	0	1	0	1
Miniature Pinscher	0	0	1	1
Norfolk Terrier	0	0	1	1
Peekapoo	1	0	0	1
Pembroke Welsh Corgi	0	0	2	2
Pitbull	4	0	0	4
Pitbull Mix	2	0	0	2
Rottweiler Mix	1	0	0	1
Rough Coated Collie	0	1	0	1
Saluki	0	1	0	1
Shih Tzu	3	0	0	3
Shih Tzu Mix	1	0	0	1
Siberian Husky	0	0	3	3
Silky Terrier	0	0	1	1
Staffordshire Terrie	1	0	0	1
Standard Poodle	0	6	0	6
Terrier Mix	2	0	0	2
Visla	0	0	1	1
Welsh Terrier	0	2	0	2
West Highland White	0	0	1	1
Whippet	0	2	0	2
Total	40	40	40	120
Age:
Analysis Variable : Age__Years_
N	Mean	Median	95% Confidence Limits of Mean		Std Dev	Std Error	Minimum	Maximum
120	6.7	7	6.06099	7.33901	3.53518	0.322716	1	16
Analysis Variable : Age__Years_
Skull_Types	N	Mean	Median	95% Confidence Limits of Mean		Std Dev	Std Error	Minimum	Maximum
Brachycephalic	40	6.125	6	4.97716	7.27284	3.58907	0.567481	1	12
Dolichocephalic	40	6.875	7	5.88677	7.86323	3.09	0.488571	1	14
Mesaticephlic	40	7.1	7	5.85439	8.34561	3.89477	0.615817	1	16
Facial Index:
Analysis Variable : Facial_Index
N	Mean	Median	95% Confidence Limits of Mean		Std Dev	Std Error	Minimum	Maximum
118	154.643	135.459	141.03	168.256	74.6699	6.87392	66.09	523.81
Analysis Variable : Facial_Index
Skull_Types	N	Mean	Median	95% Confidence Limits of Mean		Std Dev	Std Error	Minimum	Maximum
Brachycephalic	40	233.664	214.915	209.405	257.923	75.8531	11.9934	154.647	523.81
Dolichocephalic	38	94.2839	93.06	88.7413	99.8266	16.8628	2.73551	66.09	130.54
Mesaticephlic	40	132.964	134.367	127.737	138.19	16.3432	2.58409	104.123	165.104
Is there a significant difference in Facial Index between skull types?
Normality met.
F Value	P value
95.39	<.0001
Comparisons significant at the 0.05 level are indicated by ***.
Skull_Types Comparison	Difference Between Means	95% Confidence Limits		Significance
Brachycephalic - Mesaticephlic	100.7	76.18	125.22	***
Brachycephalic - Dolichocephalic	139.38	114.54	164.22	***
Mesaticephlic - Dolichocephalic	38.68	13.84	63.52	***
2. What skull type is more prone to have their (all or partial) infraorbital canal in the Quad 5 for the mesial roots? Weight correlation?
Skull_Types	M_Quad
	1	1,2	1,2,3	1,2,5	13	2	2,3	2,5	6	Total
B	0	7	2	0	4	28	5	32	2	80
D	5	15	0	6	0	22	0	32	0	80
M	0	17	1	2	0	43	6	11	0	80
Total	5	39	3	8	4	93	11	75	2	240
Analysis Variable : Portion_in_5
Skull_Types	N	Mean	Median	Std Dev	Std Error	95% Confidence Limits of Mean		Minimum	Maximum
B	32	0.444902	0.479811	0.1748	0.0309006	0.381879	0.507924	0.107588	0.729211
D	38	0.459813	0.505966	0.201361	0.0326652	0.393628	0.525999	0.0971014	0.767157
M	13	0.293797	0.274945	0.156905	0.0435177	0.19898	0.388614	0.111111	0.645793
Is there a significant difference between skull types?
Normality met.
F Value	P value
4.11	0.02
Comparisons significant at the 0.05 level are indicated by ***
Skull_Types Comparison	Difference Between Means	95% Confidence Limits
D - B	0.01491	-0.09118	0.12101
D - M	0.16602	0.02394	0.3081	***
B - D	-0.01491	-0.12101	0.09118
B - M	0.1511	0.00567	0.29654	***
M - D	-0.16602	-0.3081	-0.02394	***
M - B	-0.1511	-0.29654	-0.00567	***
Correlation with Weight:
Overall:
Pearson Correlation Coefficients	-0.38126
P-value	0.0004	Significant negative correlation
Correlation by Skull type:
	Brachycephalic	Dolichocephalic	Mesaticephlic
Pearson Correlation Coefficients	-0.53672	-0.41863	-0.54847
P-value	0.0015	0.0089	0.0523
	Significant negative correlation for all 3 skull types
3. What skull type is more prone to have their (all or partial) infraorbital canal in the Quad 6 for the distal root? Weight correlation?
Quad 6 is 12 now.
Skull_Types	D_Quad
	13	7,8,9,11	8,9,12	9	9, 12	9,11	9,11,1	9,12	Total
B	50	0	0	28	0	0	0	2	80
D	14	2	2	26	2	1	1	32	80
M	16	0	0	34	1	0	0	29	80
Total	80	2	2	88	3	1	1	63	240
Analysis Variable : Portion_in_12
Skull_Types	N	Mean	Median	Std Dev	Std Error	95% Confidence Limits of Mean		Minimum	Maximum
B	2	0.545677	0.545677	0.0601867	0.0425584	0.0049212	1.08643	0.503119	0.588235
D	37	0.321982	0.259259	0.170978	0.0281087	0.264975	0.378989	0.047619	0.611111
M	30	0.197846	0.150758	0.139266	0.0254263	0.145843	0.249848	0.0367123	0.525394
Normality NOT met.
Comparing Dolicephalic and Mesticephalic: [Brachicephalic excluded due to low sample size]
Wilcoxon Two-Sample Test
Z	-2.1939
P value	0.0282
Correlation with Weight:
Overall:
Pearson Correlation Coefficients	-0.45246
P-value	<.0001
Correlation by Skull type:
	Brachycephalic	Dolichocephalic	Mesaticephlic
Pearson Correlation Coefficients	Cannot be calculated	-0.28985	-0.68664
P-value		0.0818	<.0001	Significant negative correlation
4. Regarding the mesial roots and the portion of the infraorbital canal in Quadrant 5:
a. How many canals are not in Quad 5?
M_Quad	Frequency
1	5
1,2	39
1,2,3	3
1,2,5	8
13	4
2	93
2,3	11
2,5	75
6	2
Not in Quad 5 by skull type:
	Skull_Types=B			Skull_Types=D			Skull_Types=M
M_Quad	Portion_in_5		M_Quad	Portion_in_5		M_Quad	Portion_in_5
	0	Total		0	Total		0	Total
1,2	7	7	1	5	5	1,2	17	17
1,2,3	2	2	1,2	15	15	1,2,3	1	1
2	28	28	2	22	22	2	43	43
2,3	5	5	Total	42	42	2,3	6	6
6	2	2				Total	67	67
Total	44	44
b. How many canals are a 0 <1/3
_Quad	Frequency
1	5
1,2	39
1,2,3	3
1,2,5	5
2	93
2,3	11
2,5	23
6	2
c. How many canals are 1/3 ≤2/3
_Quad	Frequency
1,2,5	3
2,5	43
d. How many canals are 2/3 <1
_Quad	Frequency
2,5	9
e. How many canals are totally in Quad 5 (1)
None
5. Regarding the distal root and the portion of the infraorbital canal in Quadrant 6:
a. How many canals are not in Quad 12?
Quad 6 is replaced by 12
_Quad	Frequency
13	80
7,8,9,11	2
8,9,12	2
9	88
9, 12	3
9,11	1
9,11,12	1
9,12	63
b. How many canals are a 0<1/3
_Quad	Frequency
7,8,9,11	2
8,9,12	2
9	88
9, 12	1
9,11	1
9,12	42
c. How many canals are 1/3 ≤2/3
_Quad	Frequency
9, 12	2
9,11,12	1
9,12	21
d. How many canals are 2/3 <1
None
e. How many canals are totally in Quad 12 (1)
None
6. What skull type is more prone to have their mesial roots in Quad 7 (caudal to the infraorbital canal)? Weight correlation?
Section 7 is 13 now.
Skull_Types	M_Quad
	1	1,2	1,2,3	1,2,5	13	2	2,3	2,5	6	Total
B	0	7	2	0	4	28	5	32	2	80
D	5	15	0	6	0	22	0	32	0	80
M	0	17	1	2	0	43	6	11	0	80
Total	5	39	3	8	4	93	11	75	2	240
7. What skull type is more prone to have their distal root in the Quad 7 (caudal to the infraorbital canal)? Weight correlation?
Section 7 is 13 now.
Skull_Types	D_Quad
	13	7,8,9,11	8,9,12	9	9, 12	9,11	9,11,12	9,12	Total
B	50	0	0	28	0	0	0	2	80
D	14	2	2	26	2	1	1	32	80
M	16	0	0	34	1	0	0	29	80
Total	80	2	2	88	3	1	1	63	240
8. What skull types is more prone to have all their (mesial and distal roots) in Quad 7 (caudal to the infraorbital canal? Weight correlation?
Section 7 is 13 now.
	Skull_Types=Brachycephalic										Skull_Types=Dolichocephalic											Skull_Types=Mesaticephlic
M_Quad	D_Quad										M_Quad	D_Quad										M_Quad	D_Quad
	13	7,8,9,11	8,9,12	9	9, 12	9,11	9,11,12	9,12	Total			13	7,8,9,11	8,9,12	9	9, 12	9,11	9,11,12	9,12	Total			13	7,8,9,11	8,9,12	9	9, 12	9,11	9,11,12	9,12	Total
1	0	0	0	0	0	0	0	0	0		1	0	2	0	1	0	1	0	1	5		1	0	0	0	0	0	0	0	0	0
1,2	4	0	0	3	0	0	0	0	7		1,2	0	0	2	8	0	0	0	5	15		1,2	0	0	0	9	0	0	0	8	17
1,2,3	2	0	0	0	0	0	0	0	2		1,2,3	0	0	0	0	0	0	0	0	0		1,2,3	0	0	0	0	0	0	0	1	1
1,2,5	0	0	0	0	0	0	0	0	0		1,2,5	0	0	0	0	1	0	1	4	6		1,2,5	0	0	0	0	0	0	0	2	2
13	4	0	0	0	0	0	0	0	4		13	0	0	0	0	0	0	0	0	0		13	0	0	0	0	0	0	0	0	0
2	4	0	0	22	0	0	0	2	28		2	0	0	0	16	0	0	0	6	22		2	5	0	0	25	1	0	0	12	43
2,3	4	0	0	1	0	0	0	0	5		2,3	0	0	0	0	0	0	0	0	0		2,3	6	0	0	0	0	0	0	0	6
2,5	30	0	0	2	0	0	0	0	32		2,5	14	0	0	1	1	0	0	16	32		2,5	5	0	0	0	0	0	0	6	11
6	2	0	0	0	0	0	0	0	2		6	0	0	0	0	0	0	0	0	0		6	0	0	0	0	0	0	0	0	0
Total	50	0	0	28	0	0	0	2	80		Total	14	2	2	26	2	1	1	32	80		Total	16	0	0	34	1	0	0	29	80

## Sheet: 01.16.2021
Statistical Methods:
The continuous data was desribed using means and standard deviation. The data was evaluated for normality and if not met was analyzed using Kruskal-Wallis test to compare 3 groups. Correlation between 2 continuous data was analyzed using Pearson's correlation coefficient. A p-value of 0.05 was used to evaluate statistical significance. SAS v9.4 (SAS Institute Inc., Cary, NC) was used for all stat…
Results:
1. Is there a difference in the skull types with the position of the infraorbital canal in relationship to the roots of the maxillary fourth premolar based on the grid system create by author?
a. The quadrants are based off of the mesial roots and the distal root.
i. Brachycephalic vs Mesaticephalic vs Dolichocephalic
ii. Brachycephalic vs Mesaticephalic
iii. Brachycephalic vs. Dolichocephalic
iv. Mesaticephalic vs. Dolichocephalic
Mesial roots:
Right:												Left:
Skull_Types	R_M_Quad											Skull_Types	L_M_Quad
	1	1,2	1,2,3	1,2,5	2	2,3	2,5	6	13	Total			1	1,2	1,2,3	1,2,5	2	2,3	2,5	6	13	Total
Brachycephalic	0	4	1	0	14	2	16	1	2	40		Brachycephalic	0	3	1	0	14	3	16	1	2	40
Dolichocephalic	2	8	0	2	11	0	17	0	0	40		Dolichocephalic	3	7	0	4	11	0	15	0	0	40
Mesaticephlic	0	8	0	1	23	3	5	0	0	40		Mesaticephlic	0	9	1	1	20	3	6	0	0	40
Total	2	20	1	3	48	5	38	1	2	120		Total	3	19	2	5	45	6	37	1	2	120
Distal roots:
Right:												Left:
Skull_Types	R_D_Quad											Skull_Types	L_D_Quad
	7,8,9,11	8,9,12	9	9,11	9,12	13	Total						7,8,9,11	8,9,12	9	9,11,12	9,12	13	Total
Brachycephalic	0	0	14	0	1	25	40					Brachycephalic	0	0	14	0	1	25	40
Dolichocephalic	1	1	13	1	17	7	40					Dolichocephalic	1	1	13	1	17	7	40
Mesaticephlic	0	0	17	0	15	8	40					Mesaticephlic	0	0	17	0	15	8	40
Total	1	1	44	1	33	40	120					Total	1	1	44	1	33	40	120
b. Is there any correlation with body weight, sex, breed, age with the skull type and location of the infraorbital canal in relationship to the mesial roots and distal roots?
Body weight:
Analysis Variable : Weight__kg_
Skull_Types	N	Mean	Median	95% Confidence Limits of Mean		Std Dev	Std Error	Minimum	Maximum
Brachycephalic	40	14.7075	8.96	10.7223	18.6927	12.4611	1.97027	2.07	54
Dolichocephalic	40	21.2725	22.815	17.6558	24.8892	11.3088	1.78807	5	48.59
Mesaticephlic	40	20.8977	22.23	17.4735	24.322	10.7071	1.69294	2.64	39.09
Mesial roots:
Right:												Left:
Analysis Variable : Weight__kg_											Analysis Variable : Weight__kg_
R_M_Quad	N	Mean	Median	95% Confidence Limits of Mean		Std Dev	Std Error	Minimum	Maximum		L_M_Quad	N	Mean	Median	95% Confidence Limits of Mean		Std Dev	Std Error	Minimum	Maximum
1	2	31.73	31.73	-13.8853	77.3453	5.07703	3.59	28.14	35.32		1	3	31.29	30.41	22.1732	40.4068	3.67	2.11888	28.14	35.32
1,2	20	25.4065	29.18	21.074	29.739	9.25718	2.06997	5.36	39.09		1,2	19	27.4142	29.41	22.1458	32.6827	10.9308	2.50769	5.36	54
1,2,3	1	7.36	7.36	.	.	.	.	7.36	7.36		1,2,3	2	7.52	7.52	5.48701	9.55299	0.226274	0.16	7.36	7.68
1,2,5	3	25.6167	24.95	15.5771	35.6562	4.04145	2.33333	21.95	29.95		1,2,5	5	23.156	21.95	17.4626	28.8494	4.58527	2.05059	17.73	29.95
2	48	24.6615	25.07	21.4679	27.855	10.9983	1.58746	2.64	54		2	45	24.1638	25	21.1891	27.1384	9.90116	1.47598	2.64	48.59
2,3	5	9.8	11.5	4.97931	14.6207	3.88244	1.73628	4.82	13.27		2,3	6	14.25	12.205	2.24445	26.2555	11.44	4.67036	4.82	36.5
2,5	38	9.87211	6.51	7.49661	12.2476	7.22711	1.17239	2.07	32.32		2,5	37	9.33135	6.5	7.01848	11.6442	6.9369	1.14042	2.07	32.32
6	1	3.45	3.45	.	.	.	.	3.45	3.45		6	1	3.45	3.45	.	.	.	.	3.45	3.45
13	2	3.985	3.985	-16.4085	24.3785	2.26981	1.605	2.38	5.59		13	2	3.985	3.985	-16.4085	24.3785	2.26981	1.605	2.38	5.59
Distal roots:
Right:												Left:
Analysis Variable : Weight__kg_											Analysis Variable : Weight__kg_
R_D_Quad	N	Mean	Median	95% Confidence Limits of Mean		Std Dev	Std Error	Minimum	Maximum		L_D_Quad	N	Mean	Median	95% Confidence Limits of Mean		Std Dev	Std Error	Minimum	Maximum
7,8,9,11	1	35.32	35.32	.	.	.	.	35.32	35.32		7,8,9,11	1	35.32	35.32	.	.	.	.	35.32	35.32
8,9,12	1	25.55	25.55	.	.	.	.	25.55	25.55		8,9,12	1	25.55	25.55	.	.	.	.	25.55	25.55
9	44	27.6045	28.315	24.6485	30.5606	9.723	1.4658	6.32	54		9	44	27.897	28.545	24.9846	30.8095	9.57958	1.44418	6.32	54
9,11	1	28.14	28.14	.	.	.	.	28.14	28.14		9,11,12	1	17.73	17.73	.	.	.	.	17.73	17.73
9,12	33	19.5964	21.2	16.2116	22.9811	9.54577	1.66171	2.64	39.09		9,12	33	19.5218	21.2	16.1496	22.8941	9.51046	1.65556	2.64	39.09
13	40	8.1205	6.36	6.3285	9.9125	5.60322	0.885947	2.07	30.9		13	40	8.1205	6.36	6.3285	9.9125	5.60322	0.885947	2.07	30.9
Sex:
Skull_Types	Sex
	F	FS	M	MN	Total
Brachycephalic	1	22	3	14	40
Dolichocephalic	1	17	5	17	40
Mesaticephlic	3	16	1	20	40
Total	5	55	9	51	120
Breed:
Breed	Skull_Types
	Brachycephalic	Dolichocephalic	Mesaticephlic	Total
American Bulldog	1	0	0	1
American Pit Bull Te	3	0	0	3
Anatolian/Great Pyre	0	1	0	1
Australian Shepherd	0	0	5	5
Basenji	0	0	3	3
Basset Hound	0	3	0	3
Belgian Tervuren	0	2	0	2
Bichon Frise	0	0	2	2
Blue Heeler	0	0	2	2
Border Collie	0	0	2	2
Borzoi	0	1	0	1
Boston Terrier	3	0	0	3
Boxer	1	0	0	1
Cairn Terrier	0	0	1	1
Carin Terrier	0	0	1	1
Catahoula Leopard Do	0	0	1	1
Cavalier King Charle	3	0	0	3
Chihuahua	10	0	0	10
Chihuahua Mix	1	0	0	1
Chow Chow	1	0	0	1
Collie	0	1	0	1
Dachshund	0	5	0	5
Doberman Pinscher	0	2	0	2
English Mastiff	1	0	0	1
English Setter	0	1	0	1
French Bulldog	1	0	0	1
German Shepherd / Do	0	1	0	1
German Shorthaired P	0	0	1	1
Golden Retriever	0	0	2	2
Golden/Poodle	0	1	0	1
Great Dane	0	1	0	1
Greyhound	0	3	0	3
Huskey	0	0	1	1
Italian Greyhound	0	5	0	5
Labrador Retriever	0	0	9	9
Miniature Dachshund	0	1	0	1
Miniature Pinscher	0	0	1	1
Norfolk Terrier	0	0	1	1
Peekapoo	1	0	0	1
Pembroke Welsh Corgi	0	0	2	2
Pitbull	4	0	0	4
Pitbull Mix	2	0	0	2
Rottweiler Mix	1	0	0	1
Rough Coated Collie	0	1	0	1
Saluki	0	1	0	1
Shih Tzu	3	0	0	3
Shih Tzu Mix	1	0	0	1
Siberian Husky	0	0	3	3
Silky Terrier	0	0	1	1
Staffordshire Terrie	1	0	0	1
Standard Poodle	0	6	0	6
Terrier Mix	2	0	0	2
Visla	0	0	1	1
Welsh Terrier	0	2	0	2
West Highland White	0	0	1	1
Whippet	0	2	0	2
Total	40	40	40	120
Age:
Analysis Variable : Age__Years_
Skull_Types	N	Mean	Median	95% Confidence Limits of Mean		Std Dev	Std Error	Minimum	Maximum
Brachycephalic	40	6.125	6	4.97716	7.27284	3.58907	0.567481	1	12
Dolichocephalic	40	6.875	7	5.88677	7.86323	3.09	0.488571	1	14
Mesaticephlic	40	7.1	7	5.85439	8.34561	3.89477	0.615817	1	16
2. What skull type is more prone to have their (all or partial) infraorbital canal in the Quad 5 for the mesial roots? Weight correlation?
Skull_Types	R_M_Quad											Skull_Types	L_M_Quad
	1	1,2	1,2,3	1,2,5	2	2,3	2,5	6	13	Total			1	1,2	1,2,3	1,2,5	2	2,3	2,5	6	13	Total
Brachycephalic	0	4	1	0	14	2	16	1	2	40		Brachycephalic	0	3	1	0	14	3	16	1	2	40
Dolichocephalic	2	8	0	2	11	0	17	0	0	40		Dolichocephalic	3	7	0	4	11	0	15	0	0	40
Mesaticephlic	0	8	0	1	23	3	5	0	0	40		Mesaticephlic	0	9	1	1	20	3	6	0	0	40
Total	2	20	1	3	48	5	38	1	2	120		Total	3	19	2	5	45	6	37	1	2	120
Analysis Variable : R_Portion_in_5												Analysis Variable : L_Portion_in_5
Skull_Types	N	Mean	Median	Std Dev	Std Error	95% Confidence Limits of Mean		Minimum	Maximum			Skull_Types	N	Mean	Median	Std Dev	Std Error	95% Confidence Limits of Mean		Minimum	Maximum
Brachycephalic	16	0.453748	0.468613	0.188399	0.0470997	0.353357	0.554138	0.107588	0.729211			Brachycephalic	16	0.436055	0.479811	0.16579	0.0414475	0.347712	0.524399	0.109223	0.707182
Dolichocephalic	19	0.468489	0.522979	0.197761	0.0453695	0.373171	0.563807	0.140406	0.767157			Dolichocephalic	19	0.451138	0.503003	0.209946	0.0481649	0.349947	0.552329	0.0971014	0.731818
Mesaticephlic	6	0.313241	0.281089	0.138846	0.0566835	0.167531	0.45895	0.173913	0.5625			Mesaticephlic	7	0.27713	0.22973	0.180198	0.0681085	0.110475	0.443786	0.111111	0.645793
		significnat difference between these 3 do stats
Is there a significant difference between skull types?
Normality met.
F Value	P value											F Value	P value
1.64	0.2079											2.3	0.1141
Comparisons significant at the 0.05 level are indicated by ***.												Comparisons significant at the 0.05 level are indicated by ***.
Skull_Types	Difference	Simultaneous 95% Confidence										Skull_Types	Difference	Simultaneous 95% Confidence
Comparison	Between	Limits										Comparison	Between	Limits
	Means												Means
Dolichocephalic - Brachycephalic	0.01474	-0.14023	0.16972									Dolichocephalic - Brachycephalic	0.01508	-0.14157	0.17174
Dolichocephalic - Mesaticephlic	0.15525	-0.05864	0.36913									Dolichocephalic - Mesaticephlic	0.17401	-0.03012	0.37814
Brachycephalic - Dolichocephalic	-0.01474	-0.16972	0.14023									Brachycephalic - Dolichocephalic	-0.01508	-0.17174	0.14157
Brachycephalic - Mesaticephlic	0.14051	-0.07814	0.35915									Brachycephalic - Mesaticephlic	0.15892	-0.05029	0.36814
Mesaticephlic - Dolichocephalic	-0.15525	-0.36913	0.05864									Mesaticephlic - Dolichocephalic	-0.17401	-0.37814	0.03012
Mesaticephlic - Brachycephalic	-0.14051	-0.35915	0.07814									Mesaticephlic - Brachycephalic	-0.15892	-0.36814	0.05029
Correlation with Weight:												Correlation with Weight:
Overall:												Overall:
Pearson Correlation Coefficients	-0.42251											Pearson Correlation Coefficients	-0.34356
P-value	0.0059	Significant negative correlation										P-value	0.0259	Significant negative correlation
Correlation by Skull type:												Correlation by Skull type:
	Brachycephalic	Dolichocephalic	Mesaticephlic										Brachycephalic	Dolichocephalic	Mesaticephlic
Pearson Correlation Coefficients	-0.43739	-0.53135	-0.63956									Pearson Correlation Coefficients	-0.65346	-0.31359	-0.51428
P-value	0.0902	0.0192	0.1715									P-value	0.006	0.1911	0.2376
		Significant negative correlation											Significant negative correlation
3. What skull type is more prone to have their (all or partial) infraorbital canal in the Quad 12 for the distal root? Weight correlation?
Skull_Types	R_D_Quad											Skull_Types	L_D_Quad
	7,8,9,11	8,9,12	9	9,11	9,12	13	Total						7,8,9,11	8,9,12	9	9,11,12	9,12	13	Total
Brachycephalic	0	0	14	0	1	25	40					Brachycephalic	0	0	14	0	1	25	40
Dolichocephalic	1	1	13	1	17	7	40					Dolichocephalic	1	1	13	1	17	7	40
Mesaticephlic	0	0	17	0	15	8	40					Mesaticephlic	0	0	17	0	15	8	40
Total	1	1	44	1	33	40	120					Total	1	1	44	1	33	40	120
Analysis Variable : R_Portion_in_12												Analysis Variable : L_Portion_in_12
Skull_Types	N	Mean	Median	Std Dev	Std Error	95% Confidence Limits of Mean		Minimum	Maximum			Skull_Types	N	Mean	Median	Std Dev	Std Error	95% Confidence Limits of Mean		Minimum	Maximum
Brachycephalic	1	0.588235	0.588235	.	.	.	.	0.588235	0.588235			Brachycephalic	1	0.503119	0.503119	.	.	.	.	0.503119	0.503119
Dolichocephalic	18	0.315662	0.25463	0.183731	0.0433059	0.224294	0.407029	0.047619	0.599781			Dolichocephalic	19	0.32797	0.358734	0.162811	0.0373515	0.249497	0.406442	0.107143	0.611111
Mesaticephlic	15	0.190914	0.128032	0.149309	0.0385515	0.108229	0.273598	0.0367123	0.525394			Mesaticephlic	15	0.204778	0.176471	0.133338	0.0344277	0.130938	0.278618	0.0509338	0.522979
Normality NOT met.												Normality NOT met.
Comparing Dolicephalic and Mesticephalic: [Brachicephalic excluded due to low sample size]												Comparing Dolicephalic and Mesticephalic: [Brachicephalic excluded due to low sample size]
Wilcoxon Two-Sample Test												Wilcoxon Two-Sample Test
Z	-1.3213											Z	-1.7093
P value	0.1864											P value	0.0874
Correlation with Weight:												Correlation with Weight:
Overall:
Pearson Correlation Coefficients	-0.46253											Pearson Correlation Coefficients	-0.44258
P-value	0.0059											P-value	0.0078	Significant negative correlation
Correlation by Skull type:												Correlation by Skull type:
	Brachycephalic	Dolichocephalic	Mesaticephlic										Brachycephalic	Dolichocephalic	Mesaticephlic
Pearson Correlation Coefficients	Cannot be calculated	-0.28524	-0.67186									Pearson Correlation Coefficients	Cannot be calculated	-0.29749	-0.70442
P-value		0.2512	0.0061	Significant negative correlation								P-value		0.2161	0.0034
4. Regarding the mesial roots and the portion of the infraorbital canal in Quadrant 5:
a. How many canals are not in Quad 5?		How many canals are in Quad 5 but not between the mesial roots (i.e. 0)
Not in Quad 5:						How many canals are in Quad 5 but not between the mesial roots (i.e. 0)
R_M_Quad	n		L_M_Quad	n
1	2		1	3		Skull_type=B						Skull_type=D						Skull_type=M
1,2	20		1,2	19
1,2,3	1		1,2,3	2		Portion_in_5	Portion_in_5_0					Portion_in_5	Portion_in_5_0					Portion_in_5	Portion_in_5_0
2	48		2	45			0	1	2	Total			0	1	2	Total			0	1	2	Total
2,3	5		2,3	6		Mesial Combo Portion	16	0	24	40		Mesial Combo Portion	19	0	21	40		Mesial Combo Portion	6	1	33	40
6	1		6	1		Mesial L Portion in 5	16	24	0	40		Mesial L Portion in 5	19	21	0	40		Mesial L Portion in 5	7	33	0	40
13	2		13	2		Mesial R Portion in 5	16	24	0	40		Mesial R Portion in 5	19	21	0	40		Mesial R Portion in 5	6	34	0	40
						Total	48	48	24	120		Total	57	42	21	120		Total	19	68	33	120
In Quad 5:
2,5	38		2,5	37
1,2,5	3		1,2,5	5
b. How many canals are a 0 <IOC ≤1/3
Not in Quad 5:
R_M_Quad	n		L_M_Quad	n
1	2		1	3
1,2	20		1,2	19
1,2,3	1		1,2,3	2
2	48		2	45
2,3	5		2,3	6
6	1		6	1
In Quad 5:
1,2,5	2		1,2,5	3
2,5	11		2,5	12
c. How many canals are 1/3 < IOC≤2/3
Not in Quad 5:
None
In Quad 5:
R_M_Quad	n		L_M_Quad	n
1,2,5	1		1,2,5	2
2,5	22		2,5	21
d. How many canals are 2/3<IOC <1
Not in Quad 5:
None
In Quad 5:
R_M_Quad	Frequency		L_M_Quad	Frequency
2,5	5		2,5	4
e. How many canals are totally in Quad 5 (1)
None
5. Regarding the distal root and the portion of the infraorbital canal in Quadrant 12:
a. How many canals are not in Quad 12?			How many canals are in Quad 12, but dorsal to the root apex (i.e. 0)
							How many canals are in Quad 12, but dorsal to the root apex (i.e. 0)
R_D_Quad	Frequency		L_D_Quad	Frequency
7,8,9,11	1		7,8,9,11	1				Skull_type=B					Skull_type=D					Skull_type=M
8,9,12	1		8,9,12	1			Portion_in_12	Portion_in_12_0				Portion_in_12	Portion_in_12_0				Portion_in_12	Portion_in_12_0
9	44		9	44				0 (none)	1 (one side)	2 (both sides)	Total		0	1	2	Total		0	1	2	Total
9,11	1		9,11,12	1			Distal Combo Portion	1	0	39	40	Distal Combo Portion	18	1	21	40	Distal Combo Portion	14	2	24	40
9,12	33		9,12	33			Distal L Portion in 12	1	39	0	40	Distal L Portion in 12	19	21	0	40	Distal L Portion in 12	15	25	0	40
13	40		13	40			Distal R Portion in 12	1	39	0	40	Distal R Portion in 12	18	22	0	40	Distal R Portion in 12	15	25	0	40
							Total		78	39	120	Total	55	44	21	120	Total	44	52	24	120
b. How many canals are a 0 <IOC ≤1/3
Not in Quad 6:
R_D_Quad	Frequency		L_D_Quad	Frequency
7,8,9,11	1		7,8,9,11	1
9	44		9	44
9,11	1
In Quad 6:
9,12	23		9,12	20
8,9,12	1		8,9,12	1
c. How many canals are 1/3<IOC ≤2/3
R_D_Quad	Frequency		L_D_Quad	Frequency
9,12	10		9,11,12	1
			9,12	13
d. How many canals are 2/3 <IOC<1
None
e. How many canals are totally in Quad 12 (1)
None
6. What skull type is more prone to have their mesial roots in Quad 13 (caudal to the infraorbital canal)? Weight correlation?
Skull_Types	R_M_Quad											Skull_Types	L_M_Quad
	1	1,2	1,2,3	1,2,5	2	2,3	2,5	6	13	Total			1	1,2	1,2,3	1,2,5	2	2,3	2,5	6	13	Total
Brachycephalic	0	4	1	0	14	2	16	1	2	40		Brachycephalic	0	3	1	0	14	3	16	1	2	40
Dolichocephalic	2	8	0	2	11	0	17	0	0	40		Dolichocephalic	3	7	0	4	11	0	15	0	0	40
Mesaticephlic	0	8	0	1	23	3	5	0	0	40		Mesaticephlic	0	9	1	1	20	3	6	0	0	40
Total	2	20	1	3	48	5	38	1	2	120		Total	3	19	2	5	45	6	37	1	2	120
7. What skull type is more prone to have their distal root in the Quad 13 (caudal to the infraorbital canal)? Weight correlation?
Skull_Types	R_D_Quad											Skull_Types	L_D_Quad
	7,8,9,11	8,9,12	9	9,11	9,12	13	Total						7,8,9,11	8,9,12	9	9,11,12	9,12	13	Total
Brachycephalic	0	0	14	0	1	25	40					Brachycephalic	0	0	14	0	1	25	40
Dolichocephalic	1	1	13	1	17	7	40					Dolichocephalic	1	1	13	1	17	7	40
Mesaticephlic	0	0	17	0	15	8	40					Mesaticephlic	0	0	17	0	15	8	40
Total	1	1	44	1	33	40	120					Total	1	1	44	1	33	40	120
	Portion in Quad 7 data is not available to calculate means.
8. What skull types is more prone to have all their (mesial and distal roots) in Quad 13 (caudal to the infraorbital canal? Weight correlation?
	Skull_Types=Brachycephalic									Skull_Types=Dolichocephalic									Skull_Types=Mesaticephlic
R_M_Quad	R_D_Quad								M_Quad	R_D_Quad								R_M_Quad	R_D_Quad
	7,8,9,11	8,9,12	9	9,11	9,12	13	Total			7,8,9,11	8,9,12	9	9,11	9,12	13	Total			7,8,9,11	8,9,12	9	9,11	9,12	13	Total
1	0	0	0	0	0	0	0		1	1	0	0	1	0	0	2		1	0	0	0	0	0	0	0
1,2	0	0	2	0	0	2	4		1,2	0	1	4	0	3	0	8		1,2	0	0	4	0	4	0	8
1,2,3	0	0	0	0	0	1	1		1,2,3	0	0	0	0	0	0	0		1,2,3	0	0	0	0	0	0	0
1,2,5	0	0	0	0	0	0	0		1,2,5	0	0	0	0	2	0	2		1,2,5	0	0	0	0	1	0	1
2	0	0	11	0	1	2	14		2	0	0	8	0	3	0	11		2	0	0	13	0	7	3	23
2,3	0	0	0	0	0	2	2		2,3	0	0	0	0	0	0	0		2,3	0	0	0	0	0	3	3
2,5	0	0	1	0	0	15	16		2,5	0	0	1	0	9	7	17		2,5	0	0	0	0	3	2	5
6	0	0	0	0	0	1	1		6	0	0	0	0	0	0	0		6	0	0	0	0	0	0	0
13	0	0	0	0	0	2	2		13	0	0	0	0	0	0	0		13	0	0	0	0	0	0	0
Total	0	0	14	0	1	25	40		Total	1	1	13	1	17	7	40		Total	0	0	17	0	15	8	40
L_M_Quad	L_D_Quad								_M_Quad	L_D_Quad								M_Quad	L_D_Quad
	7,8,9,11	8,9,12	9	9,11,12	9,12	13	Total			7,8,9,11	8,9,12	9	9,11,12	9,12	13	Total			7,8,9,11	8,9,12	9	9,11,12	9,12	13	Total
1	0	0	0	0	0	0	0		1	1	0	1	0	1	0	3		1	0	0	0	0	0	0	0
1,2	0	0	1	0	0	2	3		1,2	0	1	4	0	2	0	7		1,2	0	0	5	0	4	0	9
1,2,3	0	0	0	0	0	1	1		1,2,3	0	0	0	0	0	0	0		1,2,3	0	0	0	0	1	0	1
1,2,5	0	0	0	0	0	0	0		1,2,5	0	0	0	1	3	0	4		1,2,5	0	0	0	0	1	0	1
2	0	0	11	0	1	2	14		2	0	0	8	0	3	0	11		2	0	0	12	0	6	2	20
2,3	0	0	1	0	0	2	3		2,3	0	0	0	0	0	0	0		2,3	0	0	0	0	0	3	3
2,5	0	0	1	0	0	15	16		2,5	0	0	0	0	8	7	15		2,5	0	0	0	0	3	3	6
6	0	0	0	0	0	1	1		6	0	0	0	0	0	0	0		6	0	0	0	0	0	0	0
13	0	0	0	0	0	2	2		13	0	0	0	0	0	0	0		13	0	0	0	0	0	0	0
Total	0	0	14	0	1	25	40		Total	1	1	13	1	17	7	40		Total	0	0	17	0	15	8	40
	Portion in Quad 13 data is not available to calculate correlations.
