# Supplementary material for: Analysis of the anatomic relationship of the infraorbital canal with the roots of the maxillary fourth premolar tooth in the three different skull types: Mesocephalic, brachycephalic, and dolichocephalic, using cone beam computed tomography
Source: Front Vet Sci. 2022 Oct 4;9:978400. doi: 10.3389/fvets.2022.978400 (PMC9577602; doi:10.3389/fvets.2022.978400)
Supplement: Supplementary file 3 [file Table_3.XLSX]

## Sheet: Percents
Mesial Roots
Right
Skull Types												Percentages in each section											IOC in section 5 Right														Percentage in Section 5											Not in Section 5	Percentage not in section 5
	1	1,2	1,2,3	1,2,5	2	2,3	2,5	6	13	total		1	1,2	1,2,3	1,2,5	2	2,3	2,5	6	13	total pop			1	1,2	1,2,3	1,2,5	2	2,3	2,5	6	13	Other	total			1	1,2	1,2,3	1,2,5	2	2,3	2,5	6	13	total		Other sections
Brachy	0	4	1	0	14	2	16	1	2	40		0	10	2.5	0	35	5	40	2.5	5	40		Brachy	0	0	0	0	0	0	16	0	0	24	40			0	0	0	0	0	0	40	0	0	40		24	60
Dolicho	2	8	0	2	11	0	17	0	0	40		5	20	0	5	27.5	0	42.5	0	0	40		Dolicho	0	0	0	2	0	0	17	0	0	21	40			0	0	0	5	0	0	42.5	0	0	40		21	52.5
Mesati	0	8	0	1	23	3	5	0	0	40		0	20	0	2.5	57.5	7.5	12.5	0	0	40		Mesati	0	0	0	1	0	0	5	0	0	34	40			0	0	0	2.5	0	0	12.5	0	0	40		34	85
Total	2	20	1	3	48	5	38	1	2	120		1.66667	16.6667	0.833333	2.5	40	4.16667	31.6667	0.833333	1.66667	120		Total	0	0	0	3	0	0	38	0	0	79	120			0	0	0	2.5	0	0	31.6667	0	0	120		79	65.8333
Mesial Roots
Left
Skull Types												Percentages in each section											IOC in section 5-left														Percentage in Section 5											Not in Section 5	Percentage not in section 5
	1	1,2	1,2,3	1,2,5	2	2,3	2,5	6	13	total		1	1,2	1,2,3	1,2,5	2	2,3	2,5	6	13	total pop			1	1,2	1,2,3	1,2,5	2	2,3	2,5	6	13	Other	total			1	1,2	1,2,3	1,2,5	2	2,3	2,5	6	13	total		Other sections
Brachy	0	3	1	0	14	3	16	1	2	40		0	7.5	2.5	0	35	7.5	40	2.5	5	40		Brachy	0	0	0	0	0	0	16	0	0	24	40			0	0	0	0	0	0	40	0	0	40		24	60
Dolicho	3	7	0	4	11	0	15	0	0	40		7.5	17.5	0	10	27.5	0	37.5	0	0	40		Dolicho	0	0	0	4	0	0	15	0	0	21	40			0	0	0	10	0	0	37.5	0	0	40		21	52.5
Mesati	0	9	1	1	20	3	6	0	0	40		0	22.5	2.5	2.5	50	7.5	15	0	0	40		Mesati	0	0	0	1	0	0	6	0	0	33	40			0	0	0	2.5	0	0	15	0	0	40		33	82.5
Total	3	19	2	5	45	6	37	1	2	120		2.5	15.8333	1.66667	4.16667	37.5	5	30.8333	0.833333	1.66667	120		Total	0	0	0	5	0	0	37	0	0	78	120			0	0	0	4.16667	0	0	30.8333	0	0	120		78	65
Mesial Roots
Left and Right Combo
Skull Types												Percentages in each section											IOC in section 5- Combo																			Percentage in Section 5					Not in Section 5
	1	1,2	1,2,3	1,2,5	2	2,3	2,5	6	13	total		1	1,2	1,2,3	1,2,5	2	2,3	2,5	6	13	total pop			1	1,2	1,2,3	1,2,5	2	2,3	2,5	6	13	other	total				5	other	Total			5	other	total		Other sections
Brachy	0	7	2	0	28	5	32	2	4	80		0	8.75	2.5	0	35	6.25	40	2.5	5	80		Brachy	0	0	0	0	0	0	32	0	0	48	80			Brachy	32	48	80		Brachy	0.4	0.6	80		48	0.6
Dolicho	5	15	0	6	22	0	32	0	0	80		6.25	18.75	0	7.5	27.5	0	40	0	0	80		Dolicho	0	0	0	6	0	0	32	0	0	42	80			Dolicho	38	42	80		Dolicho	0.475	0.525	80		42	0.525
Mesati	0	17	1	2	43	6	11	0	0	80		0	21.25	1.25	2.5	53.75	7.5	13.75	0	0	80		Mesati	0	0	0	2	0	0	11	0	0	67	80			Mesati	13	67	80		Mesati	0.1625	0.8375	80		67	0.8375
Total	5	39	3	8	93	11	75	2	4	240		2.08333	16.25	1.25	3.33333	38.75	4.58333	31.25	0.833333	1.66667	240		Total	0	0	0	8	0	0	75	0	0	157	240			Total	83	157	240		Total	0.345833	0.654167	240		157	0.654167
Distal Roots
Right
Skull Types												Percentages in each section											IOC in section 12 right												Percentage in Section 12											Not in Section 12	Percentage not in section 6
	7,8,9,11	8,9,12	9	9,11	9,11,12	9,12	13	total				7,8,9,11	8,9,12	9	9,11	9,11,12	9,12	13	total pop					7,8,9,11	8,9,12	9	9,11	9,11,12	9,12	13	other	total			7,8,9,11	8,9,12	9	9,11	9,11,12	9,12	13	total				Other sections
Brachy	0	0	14	0	0	1	25	40				0	0	35	0	0	2.5	62.5	40				Brachy	0	0	0	0	0	1	0	39	40			0	0	0	0	0	2.5	0	40				39	97.5
Dolicho	1	1	13	1	0	17	7	40				2.5	2.5	32.5	2.5	0	42.5	17.5	40				Dolicho	0	1	0	0	0	17	0	22	40			0	2.5	0	0	0	42.5	0	40				22	55
Mesati	0	0	17	0	0	15	8	40				0	0	42.5	0	0	37.5	20	40				Mesati	0	0	0	0	0	15	0	25	40			0	0	0	0	0	37.5	0	40				25	62.5
Total	1	1	44	1	0	33	40	120				0.833333	0.833333	36.6667	0.833333	0	27.5	33.3333	120				Total	0	1	0	0	0	33	0	86	120			0	0.833333	0	0	0	27.5	0	120				86	71.6667
Distal Roots
Left
Skull Types												Percentages in each section											IOC in section 12 left												Percentage in Section 12											Not in Section 12	Percentage not in section 12
	7,8,9,11	8,9,12	9	9,11	9,11,12	9,12	13	total				7,8,9,11	8,9,12	9	9,11	9,11,12	9,12	13	total pop					7,8,9,11	8,9,12	9	9,11	9,11,12	9,12	13	other	total			7,8,9,11	8,9,12	9	9,11	9,11,12	9,12	13	total				Other sections
Brachy	0	0	14	0	0	1	25	40				0	0	35	0	0	2.5	62.5	40				Brachy	0	0	0	0	0	1	0	39	40			0	0	0	0	0	2.5	0	40				39	97.5
Dolicho	1	1	13	0	1	17	7	40				2.5	2.5	32.5	0	2.5	42.5	17.5	40				Dolicho	0	1	0	0	1	17	0	21	40			0	2.5	0	0	2.5	42.5	0	40				21	52.5
Mesati	0	0	17	0	0	15	8	40				0	0	42.5	0	0	37.5	20	40				Mesati	0	0	0	0	0	15	0	25	40			0	0	0	0	0	37.5	0	40				25	62.5
Total	1	1	44	0	1	33	40	120				0.833333	0.833333	36.6667	0	0.833333	27.5	33.3333	120				Total	0	1	0	0	1	33	0	85	120			0	0.833333	0	0	0.833333	27.5	0	120				85	70.8333
Distal Roots
Left and Right Combination
Skull Types												Percentages in each section											IOC in section 12 combo												IOC in section 12 combo						Percentages IOC in section 12 combo					Not in section 12
	7,8,9,11	8,9,12	9	9,11	9,11,12	9,12	13	total				7,8,9,11	8,9,12	9	9,11	9,11,12	9,12	13	total pop					7,8,9,11	8,9,12	9	9,11	9,11,12	9,12	13	other	total				12	other	total				12	other	total		other	total
Brachy	0	0	28	0	0	2	50	80				0	0	35	0	0	2.5	62.5	80				Brachy	0	0	0	0	0	2	0	78	80			Brachy	2	78	80			Brachy	0.025	0.975	80		0.975	80
Dolicho	2	2	26	1	1	34	14	80				2.5	2.5	32.5	1.25	1.25	42.5	17.5	80				Dolicho	0	2	0	0	1	34	0	43	80			Dolicho	37	43	80			Dolicho	0.4625	0.5375	80		0.5375	80
Mesati	0	0	34	0	0	30	16	80				0	0	42.5	0	0	37.5	20	80				Mesati	0	0	0	0	0	30	0	50	80			Mesati	30	50	80			Mesati	0.375	0.625	80		0.625	80
Total	2	2	88	1	1	66	80	240				0.833333	0.833333	36.6667	0.416667	0.416667	27.5	33.3333	240				Total	0	2	0	0	1	66	0	171	240			Total	69	171	240			Total	0.2875	0.7125	240		0.7125	240
Mesial Roots
Right												Percentages
Skull Types													Group A	Group B	Group C	Group D	Group E	Total
	Group A	Group B	Group C	Group D	Group E	Total						Brachy	60	10	25	5	0	40
Brachy	24	4	10	2	0	40						Dolicho	52.5	12.5	27.5	7.5	0	40
Dolicho	21	5	11	3	0	40						Mesati	85	10	5	0	0	40
Mesati	34	4	2	0	0	40						Total	65.8333	10.8333	19.1667	4.16667	0	120
Total	79	13	23	5	0	120
Mesial Roots
Left
Skull Types												Percentages
	Group A	Group B	Group C	Group D	Group E	Total							Group A	Group B	Group C	Group D	Group E	Total
Brachy	24	4	11	1	0	40						Brachy	60	10	27.5	2.5	0	40
Dolicho	21	6	10	3	0	40						Dolicho	52.5	15	25	7.5	0	40
Mesati	33	5	2	0	0	40						Mesati	82.5	12.5	5	0	0	40
Total	78	15	23	4	0	120						Total	65	12.5	19.1667	3.33333	0	120
Mesial Roots												Mesial Roots
Combo												Combo
Skull Types												Skull Types	Percentages
	Group A	Group B	Group C	Group D	Group E	Total							Group A	Group B	Group C	Group D	Group E	Total
Brachy	48	8	21	3	0	80						Brachy	0.6	0.1	0.2625	0.0375	0	80
Dolicho	42	11	21	6	0	80						Dolicho	0.525	0.1375	0.2625	0.075	0	80
Mesati	67	9	4	0	0	80						Mesati	0.8375	0.1125	0.05	0	0	80
Total	157	28	46	9	0	240						Total	0.654167	0.116667	0.191667	0.0375	0	240
Distal Roots
Right
Skull Types												Percentages
	Group A	Group B	Group C	Group D	Group E	Total							Group A	Group B	Group C	Group D	Group E	Total
Brachy	39	0	1	0	0	40						Brachy	97.5	0	2.5	0	0	40
Dolicho	22	11	7	0	0	40						Dolicho	55	27.5	17.5	0	0	40
Mesati	25	13	2	0	0	40						Mesati	62.5	32.5	5	0	0	40
Total	86	24	10	0	0	120						Total	71.6667	20	8.33333	0	0	120
Distal Roots
Left
Skull Types												Percentages
	Group A	Group B	Group C	Group D	Group E	Total							Group A	Group B	Group C	Group D	Group E	Total
Brachy	39	0	1	0	0	40						Brachy	97.5	0	2.5	0	0	40
Dolicho	21	9	10	0	0	40						Dolicho	52.5	22.5	25	0	0	40
Mesati	25	12	3	0	0	40						Mesati	62.5	30	7.5	0	0	40
Total	85	21	14	0	0	120						Total	70.8333	17.5	11.6667	0	0	120
Combo												Combo
Skull Types												Skull Types
	Group A	Group B	Group C	Group D	Group E	Total							Group A	Group B	Group C	Group D	Group E	Total
Brachy	78	0	2	0	0	80						Brachy	0.975	0	0.025	0	0	80
Dolicho	43	20	17	0	0	80						Dolicho	0.5375	0.25	0.2125	0	0	80
Mesati	50	25	5	0	0	80						Mesati	0.625	0.3125	0.0625	0	0	80
Total	171	45	24	0	0	240						Total	0.7125	0.1875	0.1	0	0	240
Mesial Roots	Section 13
Left and Right Combo																	Mesial Roots
Skull Types												Section 13 or not					Percentage Section 13 or not
	1	1,2	1,2,3	1,2,5	2	2,3	2,5	6	13	total			Other	13	total			Other	13	total
Brachy	0	7	2	0	28	5	32	2	4	80		Brachy	76	4	80		Brachy	0.95	0.05	80
Dolicho	5	15	0	6	22	0	32	0	0	80		Dolicho	80	0	80		Dolicho	1	0	80
Mesati	0	17	1	2	43	6	11	0	0	80		Mesati	80	0	80		Mesati	1	0	80
Total	5	39	3	8	93	11	75	2	4	240		Total	236	4	240		Total	0.983333	0.0166667	240
Distal Roots
Left and Right Combination																	Distal root
Skull Types												Section 13 or not					Percentage Section 13 or not
	7,8,9,11	8,9,12	9	9,11	9,11,12	9,12	13	total					other	13	total			other	13	total
Brachy	0	0	28	0	0	2	50	80				Brachy	30	50	80		Brachy	0.375	0.625	80
Dolicho	2	2	26	1	1	34	14	80				Dolicho	66	14	80		Dolicho	0.825	0.175	80
Mesati	0	0	34	0	0	30	16	80				Mesati	64	16	80		Mesati	0.8	0.2	80
Total	2	2	88	1	1	66	80	240				Total	160	80	240		Total	0.666667	0.333333	240
												Mesial and Distal Roots					Mesial and Distal Roots
													Other	13	total			Other	13	total
												Brachy	106	54	160		Brachy	0.6625	0.3375	160
												Dolicho	146	14	160		Dolicho	0.9125	0.0875	160
												Mesati	144	16	160		Mesati	0.9	0.1	160
												Total	396	84	480		Total	0.825	0.175	480

## Sheet: Pie Chart Mesial Roots
Mesial Roots
Left and Right Combo
Skull Types												Percentages in each section
	1	1,2	1,2,3	1,2,5	2	2,3	2,5	6	13	total		1	1,2	1,2,3	1,2,5	2	2,3	2,5	6	13	total pop
Brachy	0	7	2	0	28	5	32	2	4	80		0	8.75	2.5	0	35	6.25	40	2.5	5	80
Dolicho	5	15	0	6	22	0	32	0	0	80		6.25	18.75	0	7.5	27.5	0	40	0	0	80
Mesati	0	17	1	2	43	6	11	0	0	80		0	21.25	1.25	2.5	53.75	7.5	13.75	0	0	80
Total	5	39	3	8	93	11	75	2	4	240		2.08333	16.25	1.25	3.33333	38.75	4.58333	31.25	0.833333	1.66667	240
Mesial Roots Total
Brachycephalic			Brachycephalic				Brachycephalic
1	0		1,2	7	8.75		Section 1,2	0.0875
1,2	7		1,2,3	2	2.5		Section 1,2,3	0.025
1,2,3	2		2	28	35		Section 2	0.35
1,2,5	0		2,3	5	6.25		Section 2,3	0.0625
2	28		2,5	32	40		Section 2,5	0.4
2,3	5		6	2	2.5		Section 6	0.025
2,5	32		13	4	5		Section 13	0.05
6	2		Total	80			Total	80
13	4
Total	80
Dolicho			Dolicho
1	5		1	5	6.25		Section 1	0.0625
1,2	15		1,2	15	18.75		Section 1,2	0.1875
1,2,3	0		1,2,5	6	7.5		Section 1,2,5	0.075
1,2,5	6		2	22	27.5		Section 2	0.275
2	22		2,5	32	40		Section 2,5	0.4
2,3	0		Total	80			Total	80
2,5	32
6	0
13	0
Total	80
Mesati			Mesati
1	0		1,2	17	21.25		Section 1,2	0.215
1,2	17		1,2,3	1	1.25		Section 1,2,3	0.0125
1,2,3	1		1,2,5	2	2.5		Section 1,2,5	0.025
1,2,5	2		2	43	53.75		Section 2	0.5375
2	43		2,3	6	7.5		Section 2,3	0.075
2,3	6		2,5	11	13.75		Section 2,5	0.1375
2,5	11		Total	80
6	0
13	0
Total	80
Tot Pop
1	5	2.08333		Section 1	0.0208
1,2	39	16.25		Section 1,2	0.1625
1,2,3	3	1.25		Section 1,2,3	0.0125
1,2,5	8	3.33333		Section 1,2,5	0.0333
2	93	38.75		Section 2	0.3875
2,3	11	4.58333		Section 2,3	0.0458
2,5	75	31.25		Section 2,5	0.3125
6	2	0.833333		Section 6	0.0083
13	4	1.66667		Section 13	0.0167

## Sheet: Pie Chart Distal Roots
Distal Roots
Left and Right Combination
Skull Types												Percentages in each section
	7,8,9,11	8,9,12	9	9,11	9,11,12	9,12	13	total				7,8,9,11	8,9,12	9	9,11	9,11,12	9,12	13	total pop
Brachy	0	0	28	0	0	2	50	80				0	0	35	0	0	2.5	62.5	80
Dolicho	2	2	26	1	1	34	14	80				2.5	2.5	32.5	1.25	1.25	42.5	17.5	80
Mesati	0	0	34	0	0	30	16	80				0	0	42.5	0	0	37.5	20	80
Total	2	2	88	1	1	66	80	240				0.833333	0.833333	36.6667	0.416667	0.416667	27.5	33.3333	240
Brachycephalic
Section 9	28	35		Section 9	0.35
Section 9,12	2	2.5		Section 9,12	0.025
Section 13	50	62.5		Section 13	0.625
Total	80
Dolicho
Section 7,8,9,11	2	2.5		Section 7,8,9,11	0.025
Section 8,9,12	2	2.5		Section 8,9,12	0.025
Section 9	26	32.5		Section 9	0.325
Section 9,11	1	1.25		Section 9,11	0.0125
Section 9,11,12	1	1.25		Section 9,11,12	0.0125
Section 9,12	34	42.5		Section 9,12	0.425
Section 13	14	17.5		Section 13	0.175
Total	80
Mesati
Section 9	34	42.5		Section 9	0.425
Section 9,12	30	37.5		Section 9,12	0.375
Section 13	16	20		Section 13	0.2
Total	80			Total
Total Population
Section 7,8,9,11	2	0.833333		Section 7,8,9,11	0.0083
Section 8,9,12	2	0.833333		Section 8,9,12	0.0083
Section 9	88	36.6667		Section 9	0.3667
Section 9,11	1	0.416667		Section 9,11	0.0042
Section 9,11,12	1	0.416667		Section 9,11,12	0.0042
Section 9,12	66	27.5		Section 9,12	0.275
Section 13	80	33.3333		Section 13	0.3333
Total	240

## Sheet: Pie Chart Mesial Sec 5
Mesial Roots
IOC in section 5- Combo													IOC in section 5- Combo
	1	1,2	1,2,3	1,2,5	2	2,3	2,5	6	13	other	total			1	1,2	1,2,3	1,2,5	2	2,3	2,5	6	13	other	total				5	other	Total
Brachy	0	0	0	0	0	0	32	0	0	48	80		Brachy	0	0	0	0	0	0	32	0	0	48	80			Brachy	32	48	80
Dolicho	0	0	0	6	0	0	32	0	0	42	80		Dolicho	0	0	0	6	0	0	32	0	0	42	80			Dolicho	38	42	80
Mesati	0	0	0	2	0	0	11	0	0	67	80		Mesati	0	0	0	2	0	0	11	0	0	67	80			Mesati	13	67	80
Total	0	0	0	8	0	0	75	0	0	157	240		Total	0	0	0	8	0	0	75	0	0	157	240			Total	83	157	240
Brachy
Section 2,5	32	0.4		Section 2,5	0.4
Other	48	0.6		No portion in Section 5	0.6
Total	80
Dolicho
Section 1,2,5	6	0.075		Combo	38	0.475	Section1,2,5 and Section 2,5	0.475
Section 2,5	32	0.4					No portion in Section 5	0.525
Other	42	0.525
Total	80
Mesati
Section 1,2,5	2	0.025		Combo	13	0.1625	Section 1,2,5 and Section 2,5	0.163
Section 2,5	11	0.1375					No portion in Section 5	0.8375
Other	67	0.8375
Total	80
Total Pop
Section 1,2,5	8	0.0333333		Combo	83	0.345833	Section 1,2,5 and Section 2,5	0.346
Section 2,5	75	0.3125					No portion in Section 5	0.6542
Other	157	0.654167
Total	240

## Sheet: Pie Chart Section 12
Distal Roots
IOC in section 12 combo													IOC in section 12 combo						Percentages IOC in section 12 combo					Not in section 12
	7,8,9,11	8,9,12	9	9,11	9,11,12	9,12	13	other	total					12	other	total				12	other	total		other	total
Brachy	0	0	0	0	0	2	0	78	80				Brachy	2	78	80			Brachy	0.025	0.975	80		0.975	80
Dolicho	0	2	0	0	1	34	0	43	80				Dolicho	37	43	80			Dolicho	0.4625	0.5375	80		0.5375	80
Mesati	0	0	0	0	0	30	0	50	80				Mesati	30	50	80			Mesati	0.375	0.625	80		0.625	80
Total	0	2	0	0	1	66	0	171	240				Total	69	171	240			Total	0.2875	0.7125	240		0.7125	240
Brachy				Brachy
Section 9,12	2	0.025		Section 9,12	0.025
Other Sections* Do Not Include Section 12	78	0.975		No portion in Section 12	0.975
Total	80
Dolicho							Dolicho
Section 8,9,12	2	0.025		Section 8,9, 12; Section 9, 11, 12; Section 9, 12	37	0.4625	Section 8,9,12; Section 9,11,12; and Section 9,12	0.463
Section 9,11,12	1	0.0125		Other sections	43	0.5375	No portion in Section 12	0.5375
Section 9,12	34	0.425
Other Sections* Do Not Include Section 12	43	0.5375
Total	80
Mesati				Mesati
Section 9,12	30	0.375		Section 9,12	0.375
Other Sections* Do Not Include Section 12	50	0.625		No portion in Section 12	0.625
Total	80
Total				Total			Total
Section 8,9,12	2	0.00833333		Section 8,9,12; Section 9,11,12; and Section 9,12	69	0.2875	Section 8,9,12; Section 9,11,12; and Section 9,12	0.288
Section 9,11,12	1	0.00416667		Other	171	0.7125	No portion in Section 12	0.7125
Section 9,12	66	0.275
Other Sections* Do Not Include Section 12	171	0.7125
Total	240

## Sheet: Pie Portion 5
Mesial Roots Section 5 Groups								Mesial Roots
Combo								Combo
Skull Types								Skull Types	Percentages
	Group A	Group B	Group C	Group D	Group E	Total			Group A	Group B	Group C	Group D	Group E	Total
Brachy	48	8	21	3	0	80		Brachy	0.6	0.1	0.2625	0.0375	0	80
Dolicho	42	11	21	6	0	80		Dolicho	0.525	0.1375	0.2625	0.075	0	80
Mesati	67	9	4	0	0	80		Mesati	0.8375	0.1125	0.05	0	0	80
Total	157	28	46	9	0	240		Total	0.654167	0.116667	0.191667	0.0375	0	240
Brachy
Group A	48	0.6		Group A	0.6
Group B	8	0.1		Group B	0.1
Group C	21	0.2625		Group C	0.2625
Group D	3	0.0375		Group D	0.0375
Group E	0	0		Group E	0
Total	80		Legend for Figure:	Group A: None of IOC is in Section 5; Group B: 0≤1/3 in Section 5; Group C: 1/3≤2/3 of IOC in Section 5; Group D: 2/3<1 of IOC In Section 5; Group E: IOC is fully in Section 5
Dolicho
Group A	42	0.525		Group A	0.525
Group B	11	0.1375		Group B	0.1375
Group C	21	0.2625		Group C	0.2625
Group D	6	0.075		Group D	0.075
Group E	0	0		Group E	0
Total	80
Mesati
Group A	67	0.8375		Group A	0.8375
Group B	9	0.1125		Group B	0.1125
Group C	4	0.05		Group C	0.05
Group D	0	0		Group D	0
Group E	0	0		Group E	0
Total	80
Total
Group A	157	0.654167		Group A	0.6542
Group B	28	0.116667		Group B	0.1167
Group C	46	0.191667		Group C	0.1917
Group D	9	0.0375		Group D	0.0375
Group E	0	0		Group E	0
Total	240

## Sheet: Pie Portion 12
Distal Combo Section 12 Groups												Combo
Skull Types												Skull Types
	Group A	Group B	Group C	Group D	Group E	Total							Group A	Group B	Group C	Group D	Group E	Total
Brachy	78	0	2	0	0	80						Brachy	0.975	0	0.025	0	0	80
Dolicho	43	20	17	0	0	80						Dolicho	0.5375	0.25	0.2125	0	0	80
Mesati	50	25	5	0	0	80						Mesati	0.625	0.3125	0.0625	0	0	80
Total	171	45	24	0	0	240						Total	0.7125	0.1875	0.1	0	0	240
Legend for Figure:	Group A: None of IOC is in Section 12; Group B: 0≤1/3 in Section 12; Group C: 1/3≤2/3 of IOC in Section 12; Group D: 2/3<1 of IOC In Section 12; Group E: IOC is fully in Section 12
Brachy				Brachy
Group A	78	97.5		Group A	0.975
Group B	0	0		Group B	0
Group C	2	2.5		Group C	0.025
Group D	0	0		Group D	0
Group E	0	0		Group E	0
Total	80
Dolicho				Dolicho
Group A	43	53.75		Group A	0.5375
Group B	20	25		Group B	0.25
Group C	17	21.25		Group C	0.2125
Group D	0	0		Group D	0
Group E	0	0		Group E	0
Total	80			Total
Mesati				Mesati
Group A	50	62.5		Group A	0.625
Group B	25	31.25		Group B	0.3125
Group C	5	6.25		Group C	0.0625
Group D	0	0		Group D	0
Group E	0	0		Group E	0
Total	80			Total
Total				Total
Group A	171	71.25		Group A	0.7125
Group B	45	18.75		Group B	0.1875
Group C	24	10		Group C	0.1
Group D	0	0		Group D	0
Group E	0	0		Group E	0
Total	240			Total

## Sheet: Pie Portion 13 
Section 13
Mesial Roots	Section 13
Left and Right Combo																	Mesial Roots
Skull Types												Section 13 or not					Percentage Section 13 or not
	1	1,2	1,2,3	1,2,5	2	2,3	2,5	6	13	total			Other	13	total			Other	13	total
Brachy	0	7	2	0	28	5	32	2	4	80		Brachy	76	4	80		Brachy	0.95	0.05	80
Dolicho	5	15	0	6	22	0	32	0	0	80		Dolicho	80	0	80		Dolicho	1	0	80
Mesati	0	17	1	2	43	6	11	0	0	80		Mesati	80	0	80		Mesati	1	0	80
Total	5	39	3	8	93	11	75	2	4	240		Total	236	4	240		Total	0.983333	0.0166667	240
Brachy			Brachy
Other	76		Not in Section 13	0.95
Section 13	4		Section 13	0.05
total	80
Dolicho			Dolicho
Other	80		Not in Section 13	1
Section 13	0		Section 13	0
total	80
Meso			Meso
Other	80		Not in Section 13	1
Section 13	0		Section 13	0
Total	80
Total Pop			Total pop
Other	236		Not in Section 13	0.983333
Section 13	4		Section 13	0.0166667
total	240
Distal Roots
Left and Right Combination																	Distal root
Skull Types												Section 13 or not					Percentage Section 13 or not
	7,8,9,11	8,9,12	9	9,11	9,11,12	9,12	13	total					other	13	total			other	13	total
Brachy	0	0	28	0	0	2	50	80				Brachy	30	50	80		Brachy	0.375	0.625	80
Dolicho	2	2	26	1	1	34	14	80				Dolicho	66	14	80		Dolicho	0.825	0.175	80
Mesati	0	0	34	0	0	30	16	80				Mesati	64	16	80		Mesati	0.8	0.2	80
Total	2	2	88	1	1	66	80	240				Total	160	80	240		Total	0.666667	0.333333	240
Brachy			Brachy
Other	30		Not in Section 13	0.375
Section 13	50		Section 13	0.625
total	80
Dolicho			Dolicho
Other	66		Not in Section 13	0.825
Section 13	14		Section 13	0.175
total	80
Meso			Meso
Other	64		Not in Section 13	0.8
Section 13	16		Section 13	0.2
Total	80
Total Pop			Total Pop
Other	160		Not in Section 13	0.666667
Section 13	80		Section 13	0.333333
total	240
Mesial and Distal Roots					Mesial and Distal Roots
	Other	13	total			Other	13	total
Brachy	106	54	160		Brachy	0.6625	0.3375	160
Dolicho	146	14	160		Dolicho	0.9125	0.0875	160
Mesati	144	16	160		Mesati	0.9	0.1	160
Total	396	84	480		Total	0.825	0.175	480
Brachy			Brachy
Other	106		Not in Section 13	0.6625
Section 13	54		Section 13	0.3375
total	160
Dolicho			Dolicho
Other	146		Not in Section 13	0.9125
Section 13	14		Section 13	0.0875
total	160
Meso			Meso
Other	144		Not in Section 13	0.9
Section 13	16		Section 13	0.1
Total	160
Total Pop			Total pop
Other	396		Not in Section 13	0.825
Section 13	84		Section 13	0.175
total	480
